# Supplementary material
Source: PubMed Central journal article supplement (PMC9757903)
Supplement: mmc1.pdf [file mmc1.pdf]

# THE LANCET

## Gastroenterology & Hepatology

### Supplementary appendix

This appendix formed part of the original submission and has been peer reviewed. We post it as supplied by the authors.

Supplement to: Liu Z, Le K, Zhou X, et al. Neutralising antibody potency against SARS-CoV-2 wild-type and omicron BA.1 and BA.4/5 variants in patients with inflammatory bowel disease treated with infliximab and vedolizumab after three doses of COVID-19 vaccine (CLARITY IBD): an analysis of a prospective multicentre cohort study. *Lancet Gastroenterol Hepatol* 2022; published online Dec 5. [https://doi.org/10.1016/S2468-1253\(22\)00389-2](https://doi.org/10.1016/S2468-1253(22)00389-2).

## Supplementary appendix

### Table of contents

|                                                                                                                                                                                                                                                                                                             |    |
|-------------------------------------------------------------------------------------------------------------------------------------------------------------------------------------------------------------------------------------------------------------------------------------------------------------|----|
| <b>Supplementary Figure 1.</b> Performance check of the multivariate model of neutralising NT50 NT50 against SARS-CoV-2 wild-type virus after three vaccine doses adjusting for different covariables.                                                                                                      | 1  |
| <b>Supplementary Figure 2.</b> Performance check of the multivariate model of neutralising NT50 NT50 against BA.1 after three vaccine doses adjusting for different covariables.                                                                                                                            | 2  |
| <b>Supplementary Figure 3.</b> Performance check of the multivariate model of neutralising NT50 NT50 against BA.4/5 after three vaccine doses adjusting for different covariables.                                                                                                                          | 4  |
| <b>Supplementary Figure 4.</b> NT50 fold reduction of BA.4/5 compared with wild-type strain measured by NT50 (WT/BA.4/5).                                                                                                                                                                                   | 5  |
| <b>Supplementary Figure 5.</b> Comparison of NT50 against SARS-CoV-2 variants wild-type strain, BA.1 and BA.4/5 in IBD patients treated infliximab or vedolizumab with or without immunomodulators.                                                                                                         | 6  |
| <b>Supplementary Figure 6.</b> Exponentiated coefficients of multivariable linear regression models of log NT50 against SARS-CoV-2 wild-type strain, BA.1 and BA.4/5 after the third vaccine dose in patients with Crohn's disease.                                                                         | 8  |
| <b>Supplementary Figure 7.</b> Exponentiated coefficients of multivariable linear regression models of log NT50 against SARS-CoV-2 wild-type strain, BA.1 and BA.4/5 after the third vaccine dose in patients with ulcerative colitis.                                                                      | 10 |
| <b>Supplementary Figure 8.</b> Multivariable Cox proportional hazards regression model of factors associated with the risk of SARS-CoV-2 breakthrough infection in all patients with Crohn's disease (A) and patients with Crohn's disease who had a breakthrough infection (B).                            | 11 |
| <b>Supplementary Figure 9.</b> Multivariable Cox proportional hazards regression model of factors associated with the risk of SARS-CoV-2 breakthrough infection in all patients with ulcerative colitis (A) and patients with ulcerative colitis who had a breakthrough infection (B).                      | 13 |
| <b>Supplementary Figure 10.</b> Multivariable Cox proportional hazards regression model of factors associated with the risk of SARS-CoV-2 breakthrough infection in all patients treated with immunomodulators (A) and patients with immunomodulators who had a breakthrough infection (B).                 | 14 |
| <b>Supplementary Figure 11.</b> Multivariable Cox proportional hazards regression model of factors associated with the risk of SARS-CoV-2 breakthrough infection in all patients without immunomodulator treatment (A) and patients without immunomodulator treatment who had a breakthrough infection (B). | 15 |

**Supplementary Figure 12.** Multivariable Cox proportional hazards regression model of factors associated with the risk of SARS-CoV-2 breakthrough infection in all patients with PRO2 active IBD disease (A) and patients with active IBD who had a breakthrough infection (B). 17

**Supplementary Figure 13.** Multivariable Cox proportional hazards regression model of factors associated with the risk of SARS-CoV-2 breakthrough infection in all patients with inactive IBD (defined by PRO2) (A) and patients with inactive IBD who had a breakthrough infection (B). 18

**Supplementary Figure 14.** Multivariable Cox proportional hazards regression model of factors associated with the risk of SARS-CoV-2 breakthrough infection in all patients with steroid treatment (A) and patients with steroid treatment who had a breakthrough infection (B). 19

**Supplementary Figure 15.** Multivariable Cox proportional hazards regression model of factors associated with the risk of SARS-CoV-2 breakthrough infection in all patients without steroid treatment (A) and patients without steroid treatment who had a breakthrough infection (B). 21

**Supplementary Table 1.** Contributors to the CLARITY IBD study 23

### Linearity

Reference line should be flat and horizontal

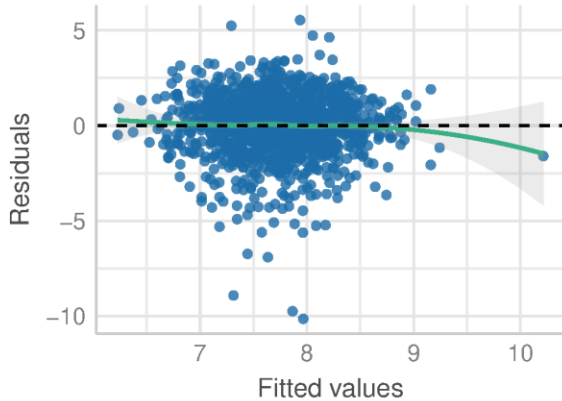

### Homogeneity of Variance

Reference line should be flat and horizontal

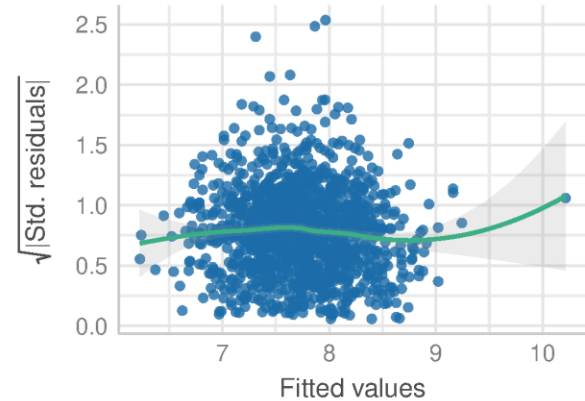

### Influential Observations

Points should be inside the contour lines

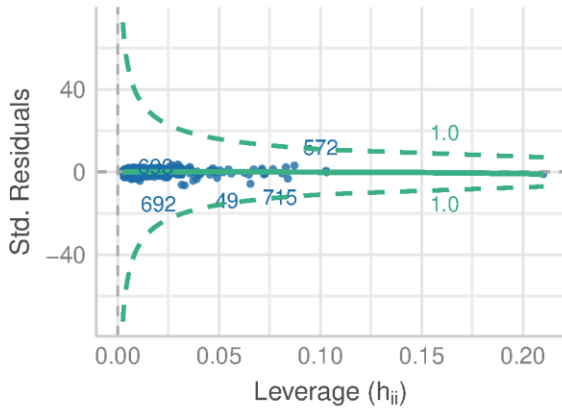

### Collinearity

High collinearity (VIF) may inflate parameter uncertainty

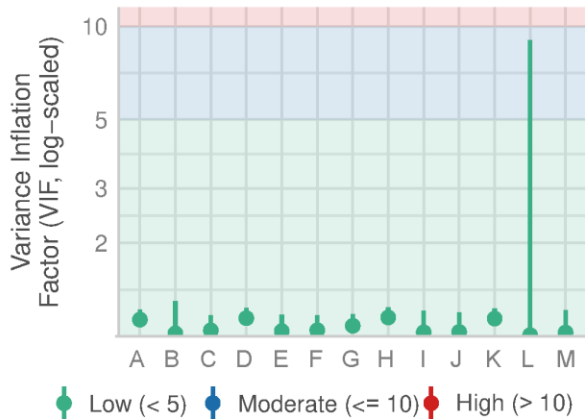

### Normality of Residuals

Dots should fall along the line

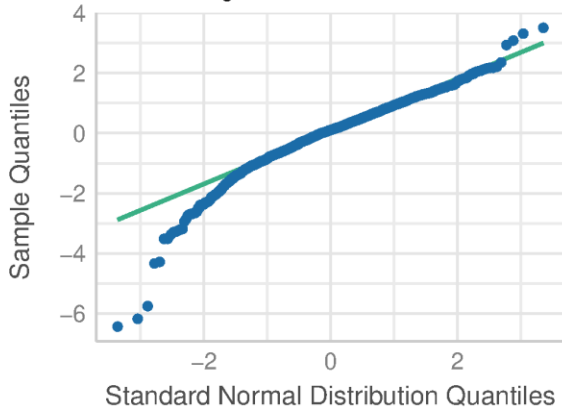

### Normality of Residuals

Distribution should be close to the normal curve

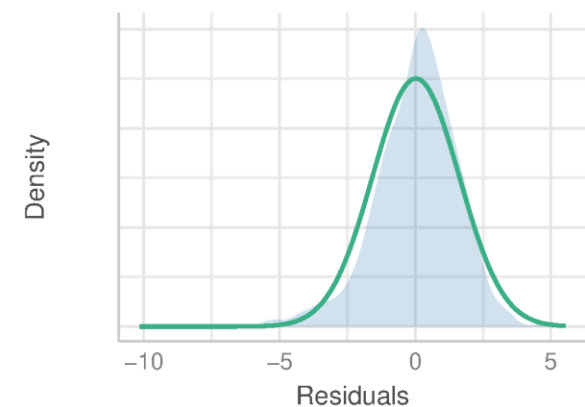

**Supplementary Figure 1.** Performance check of the multivariate model of neutralising NT50 NT50 against SARS-CoV-2 wild-type virus after three vaccine doses adjusting for different covariables. The variables adjusted were labelled with the letters A to L in the Collinearity plot. Keys: A: age, B: biologics (infliximab vs vedolizumab), C: body

mass index, D: IBD diagnosis, E: race, F: vaccine schedule (heterologous vs heterologous, G: methotrexate, H: PRO2 active IBD disease, I: sex, J: steroids, K: thiopurine, L: interval weeks between blood sampling and 3<sup>rd</sup> vaccine, M: interval weeks between 2<sup>nd</sup> and 3<sup>rd</sup> vaccine dose.

### Linearity

Reference line should be flat and horizontal

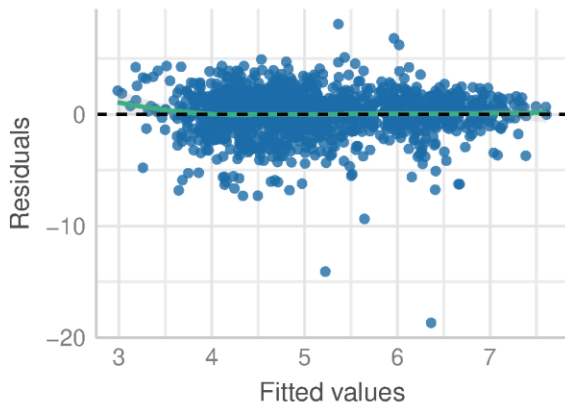

### Homogeneity of Variance

Reference line should be flat and horizontal

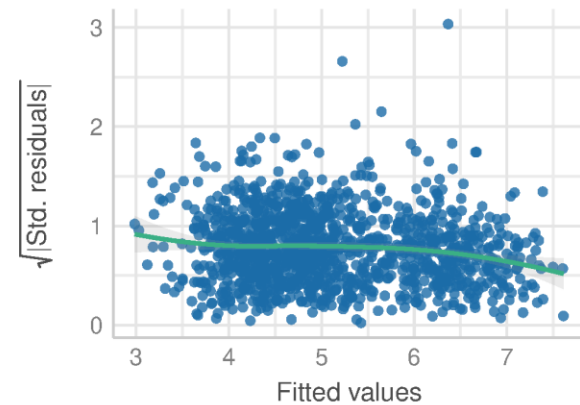

### Influential Observations

Points should be inside the contour lines

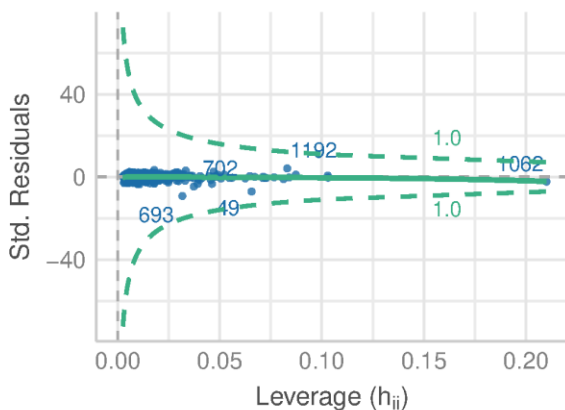

### Collinearity

High collinearity (VIF) may inflate parameter uncertainty

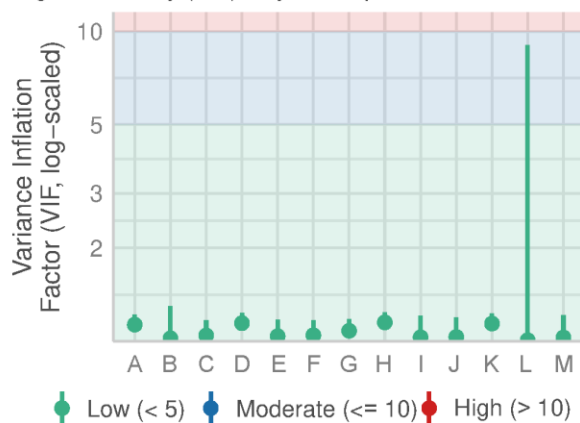

### Normality of Residuals

Dots should fall along the line

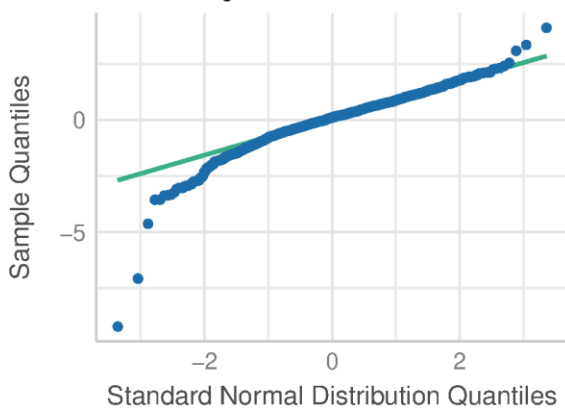

### Normality of Residuals

Distribution should be close to the normal curve

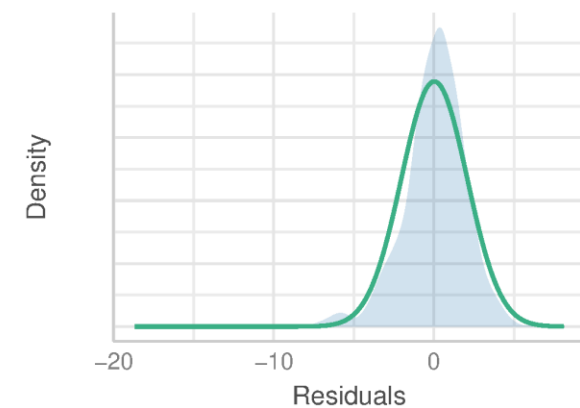

**Supplementary Figure 2.** Performance check of the multivariate model of neutralising NT50 NT50 against BA.1 after three vaccine doses adjusting for different covariables. The variables adjusted were labelled with the letters A to L in the Collinearity plot. Keys: A: age, B: biologics (infliximab vs vedolizumab), C: body mass index, D: IBD diagnosis, E: race, F: vaccine schedule (heterologous vs heterologous, G: methotrexate, H: PRO2 active IBD disease, I: sex, J: steroids, K: thiopurine, L: interval weeks between blood sampling and 3<sup>rd</sup> vaccine, M: interval weeks between 2<sup>nd</sup> and 3<sup>rd</sup> vaccine dose.

### Linearity

Reference line should be flat and horizontal

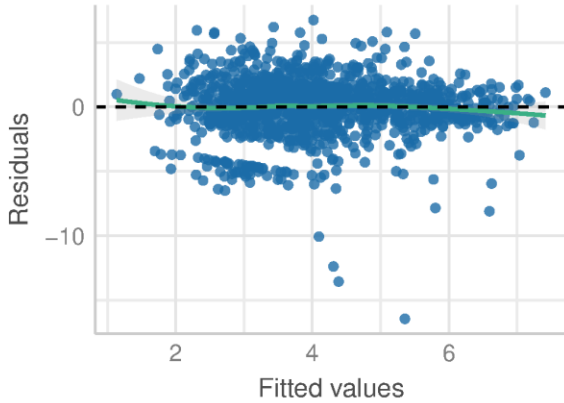

### Homogeneity of Variance

Reference line should be flat and horizontal

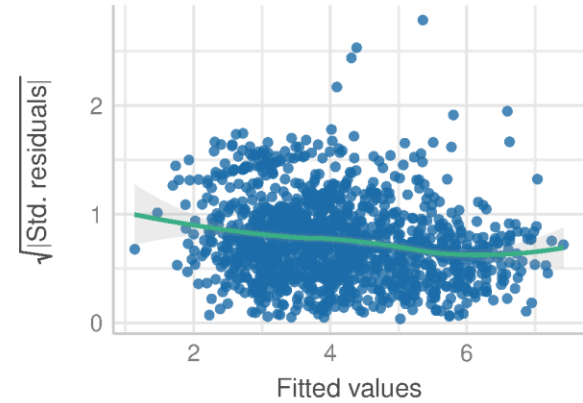

### Influential Observations

Points should be inside the contour lines

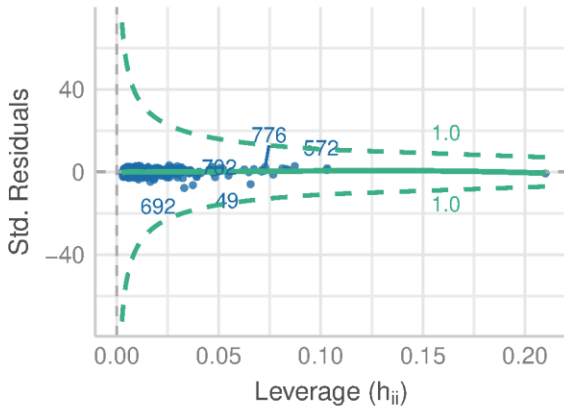

### Collinearity

High collinearity (VIF) may inflate parameter uncertainty

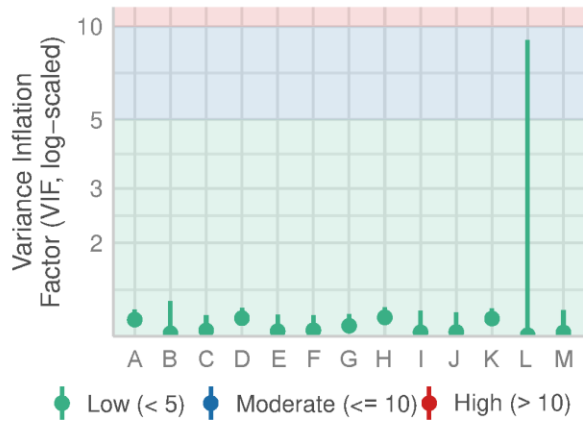

### Normality of Residuals

Dots should fall along the line

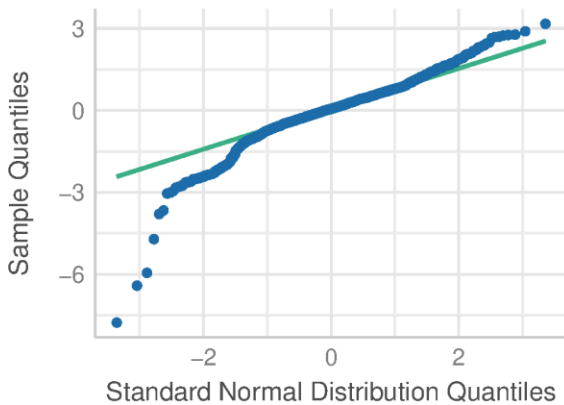

### Normality of Residuals

Distribution should be close to the normal curve

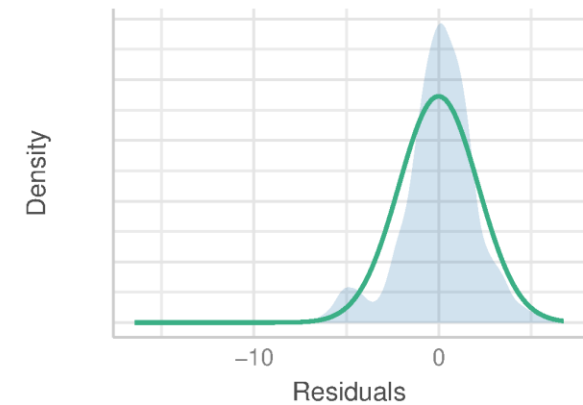

**Supplementary Figure 3.** Performance check of the multivariate model of neutralising NT50 NT50 against BA.4/5 after three vaccine doses adjusting for different covariables. The variables adjusted were labelled with the letters A to L in the Collinearity plot. Keys: A: age, B: biologics (infliximab vs vedolizumab), C: body mass

index, D: IBD diagnosis, E: race, F: vaccine schedule (heterologous vs heterologous, G: methotrexate, H: PRO2 active IBD disease, I: sex, J: steroids, K: thiopurine, L: interval weeks between blood sampling and 3<sup>rd</sup> vaccine, M: interval weeks between 2<sup>nd</sup> and 3<sup>rd</sup> vaccine dose.

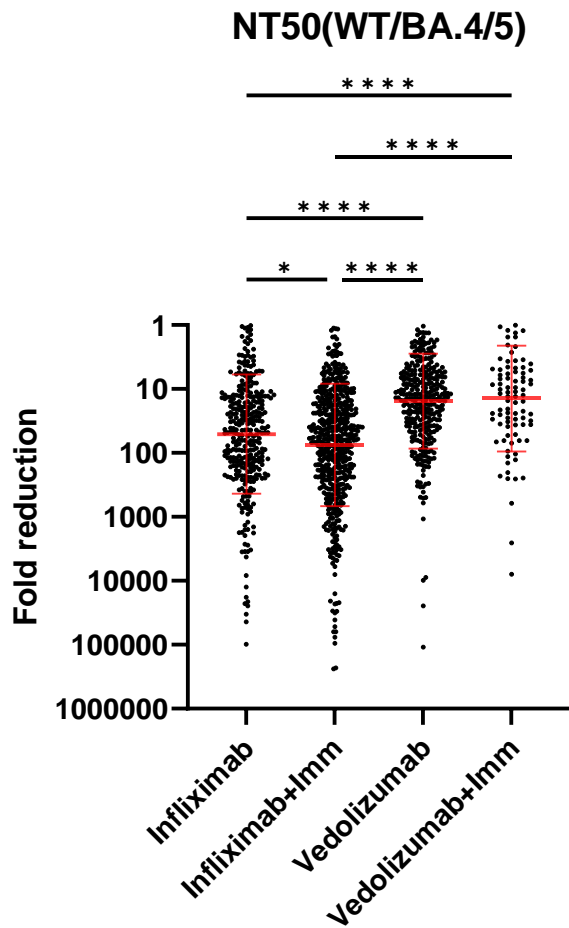

**Supplementary Figure 4.** NT50 fold reduction of BA.4/5 compared with wild-type strain measured by NT50 (WT/BA.4/5). Kruskal-Wallis test with Benjamini-Hochberg correction was performed. \*  $p < 0.05$ , \*\*\*\*  $p < 0.0001$ . Red bars represent geometric mean and standard deviation. Imm: immunomodulators.



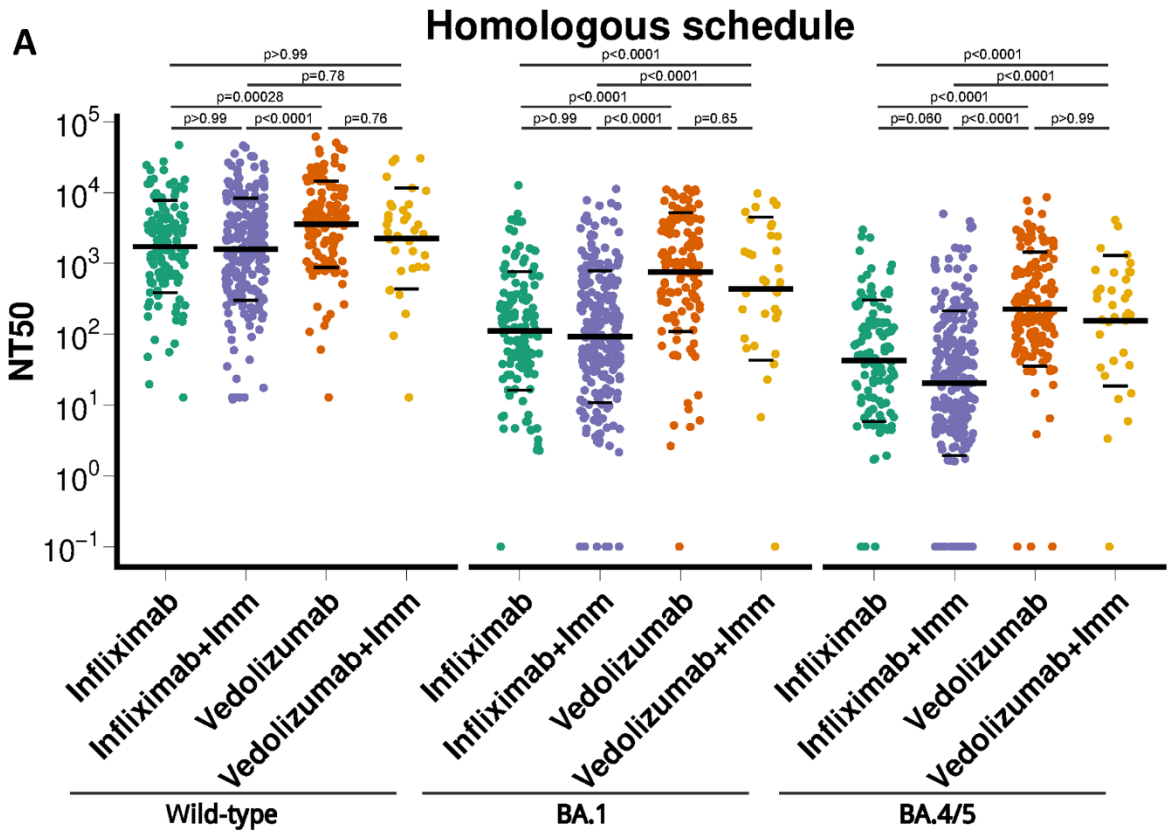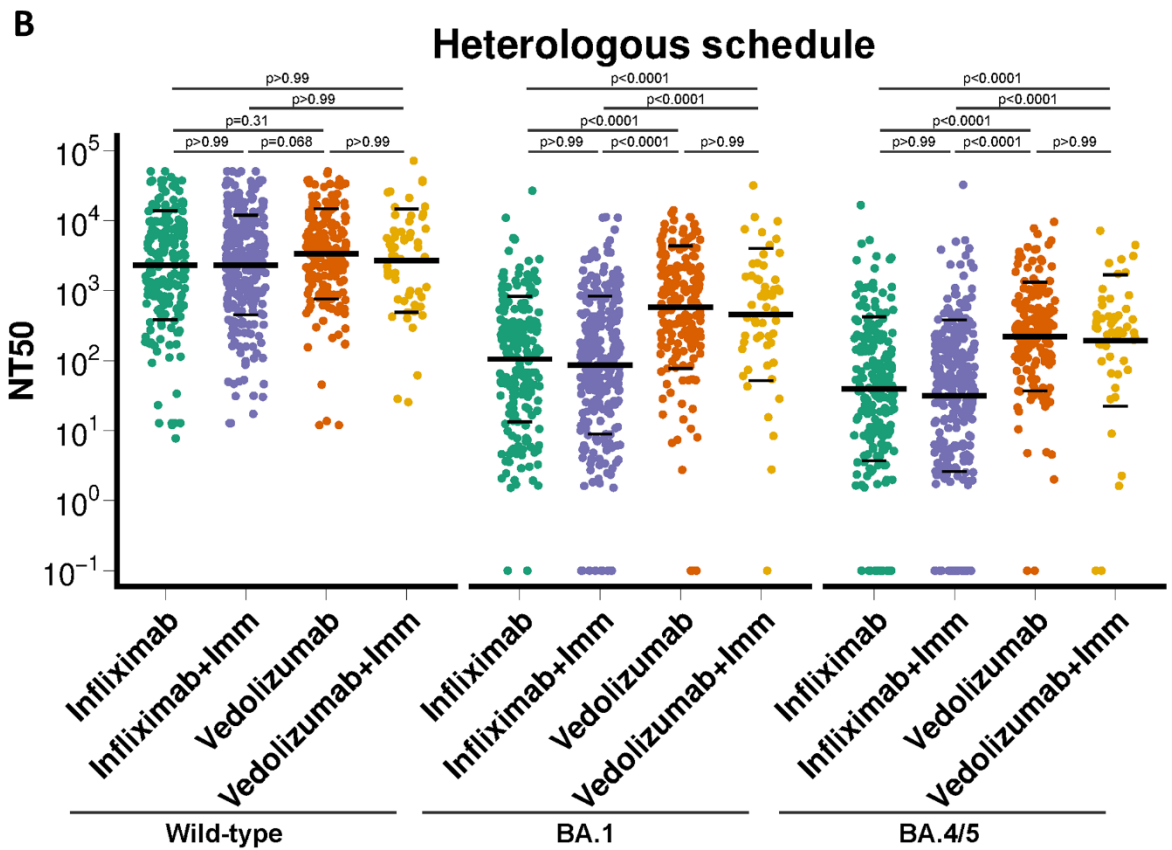

**Supplementary Figure 5.** Comparison of NT50 against SARS-CoV-2 variants wild-type strain, BA.1 and BA.4/5 in IBD patients treated infliximab or vedolizumab with or without immunomodulators (Imm). The crossbar represented the geometric mean and standard deviation. Kruskal-Wallis test with Benjamini-Hochberg correction was performed.

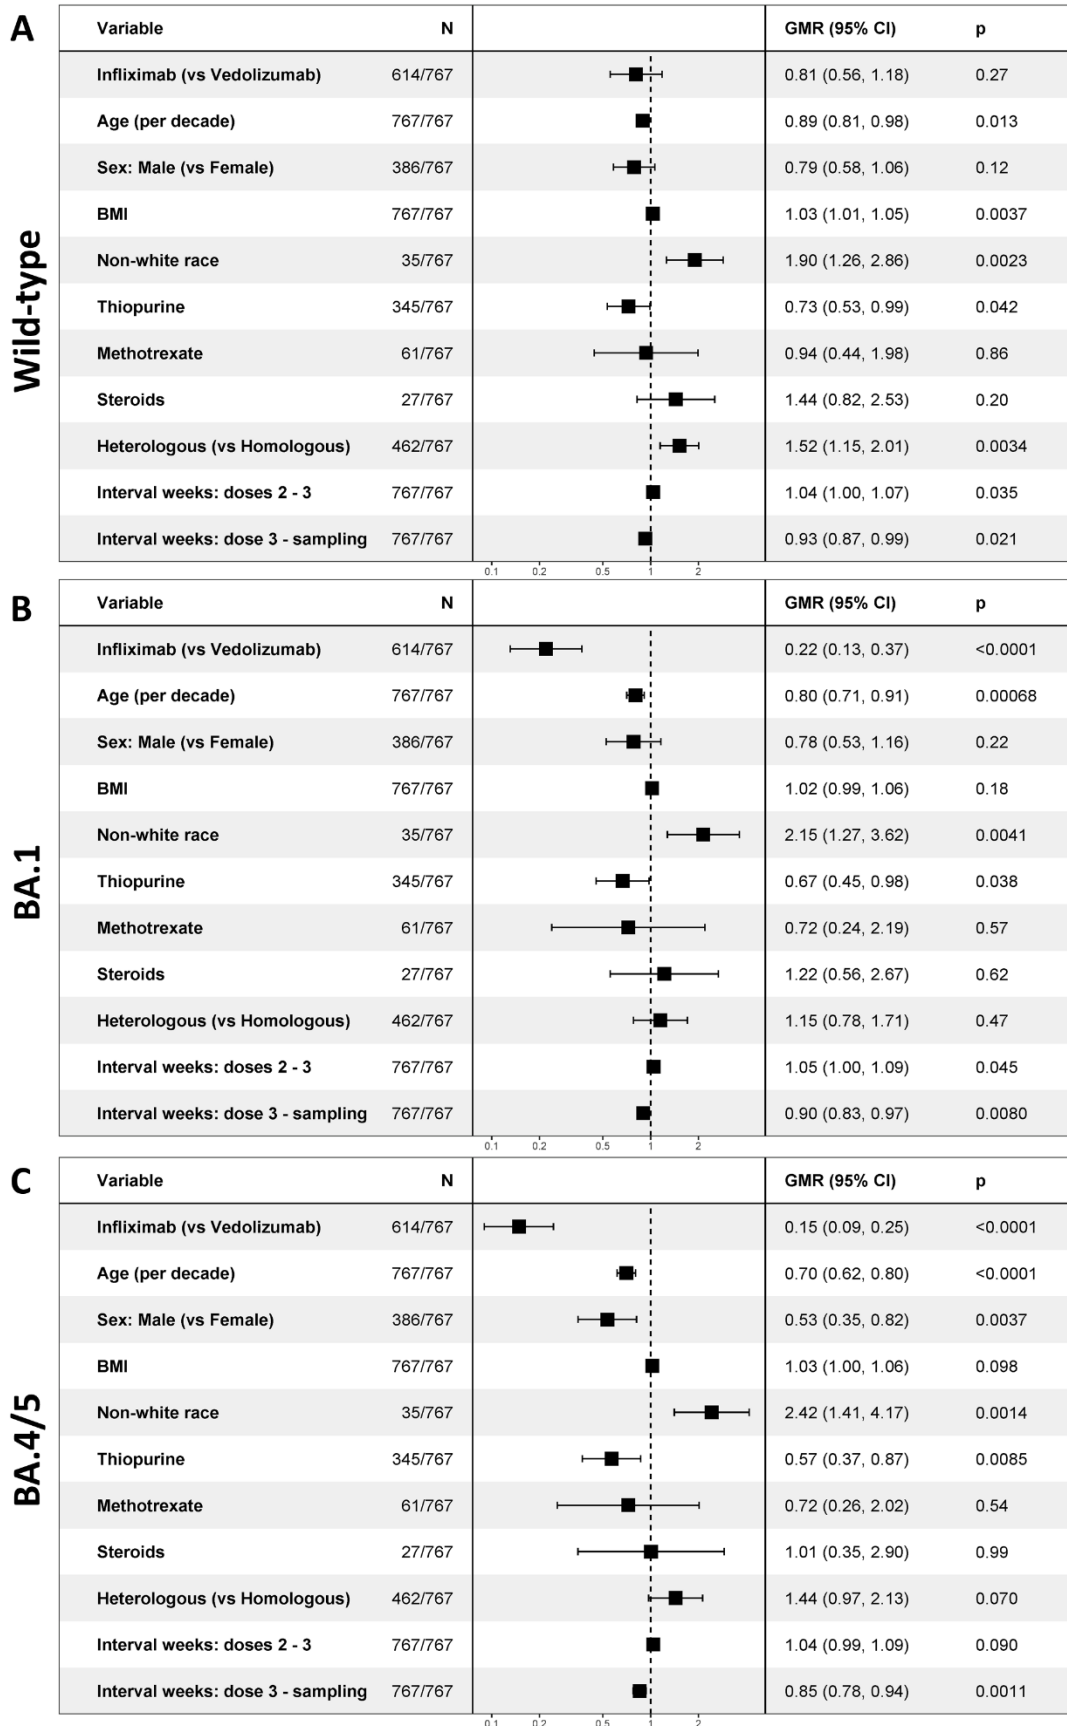

**Supplementary Figure 6.** Exponentiated coefficients of multivariable linear regression models of log NT50 against SARS-CoV-2 wild-type strain, BA.1 and BA.4/5 after the third vaccine dose in patients with Crohn's disease. The resultant values represent the geometric mean ratio of NT50 associated with each variable.

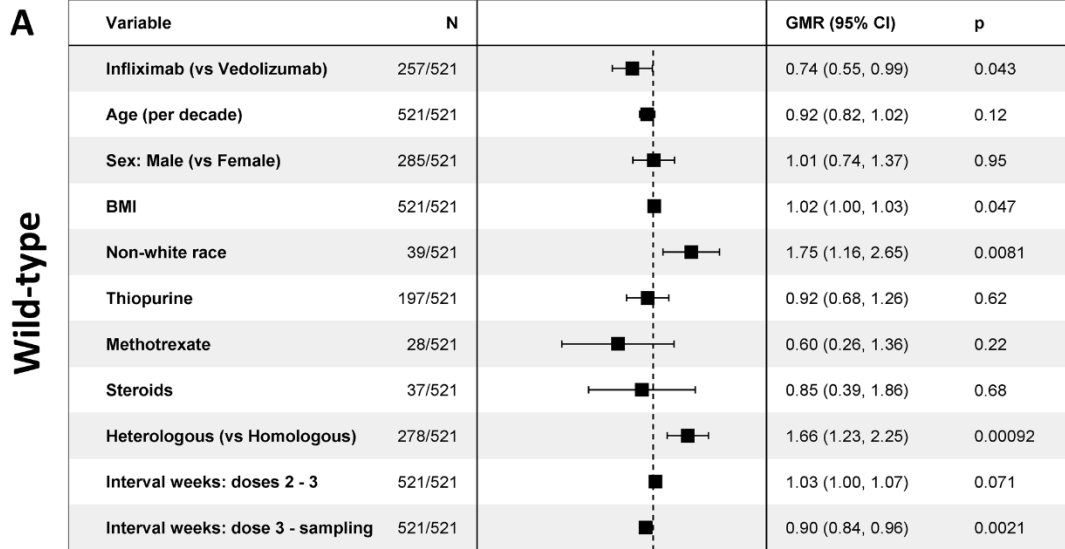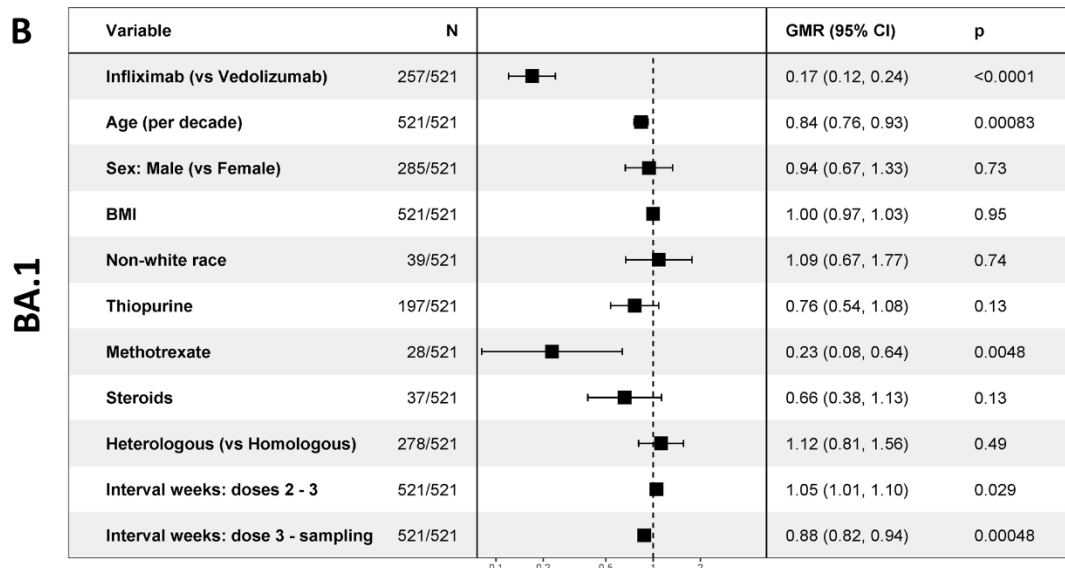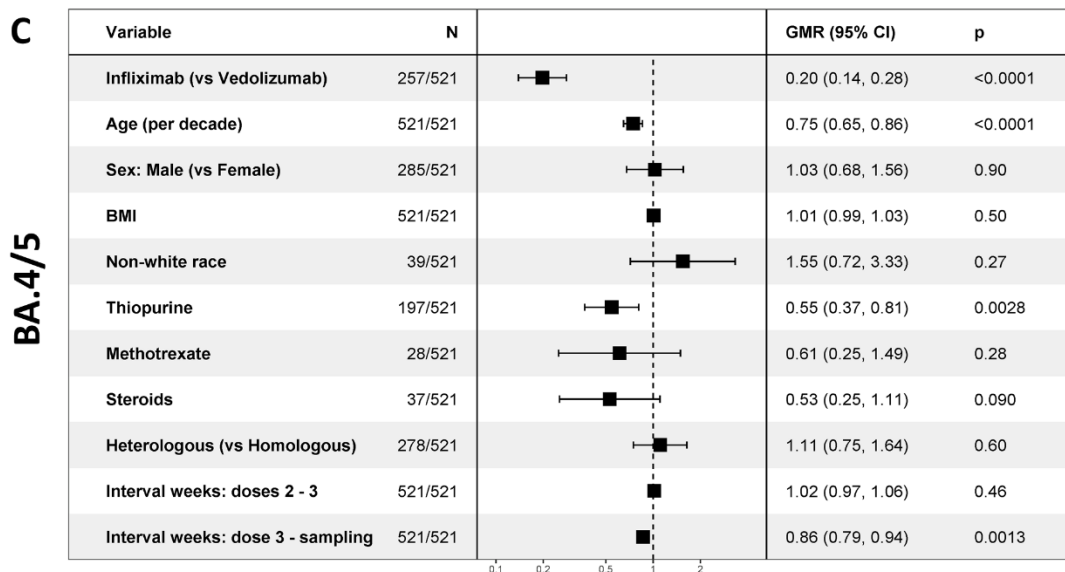

**Supplementary Figure 7.** Exponentiated coefficients of multivariable linear regression models of log NT50 against SARS-CoV-2 wild-type strain, BA.1 and BA.4/5 after the third vaccine dose in patients with ulcerative colitis. The resultant values represent the geometric mean ratio of NT50 associated with each variable.

**A**

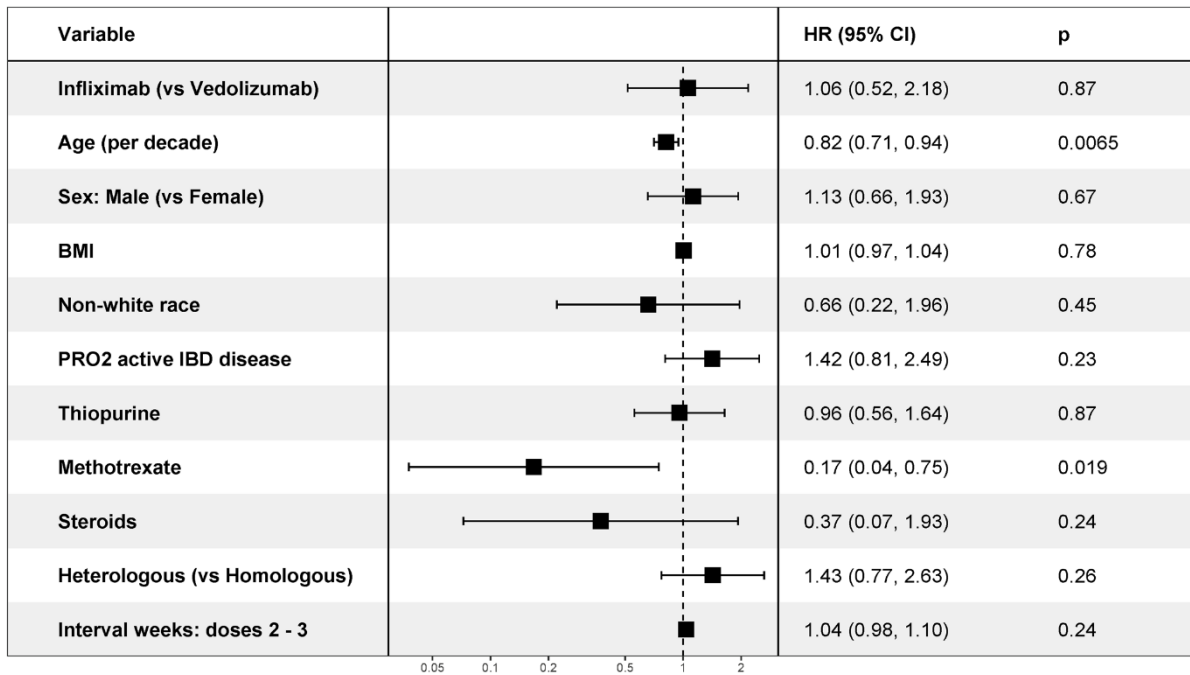

**B**

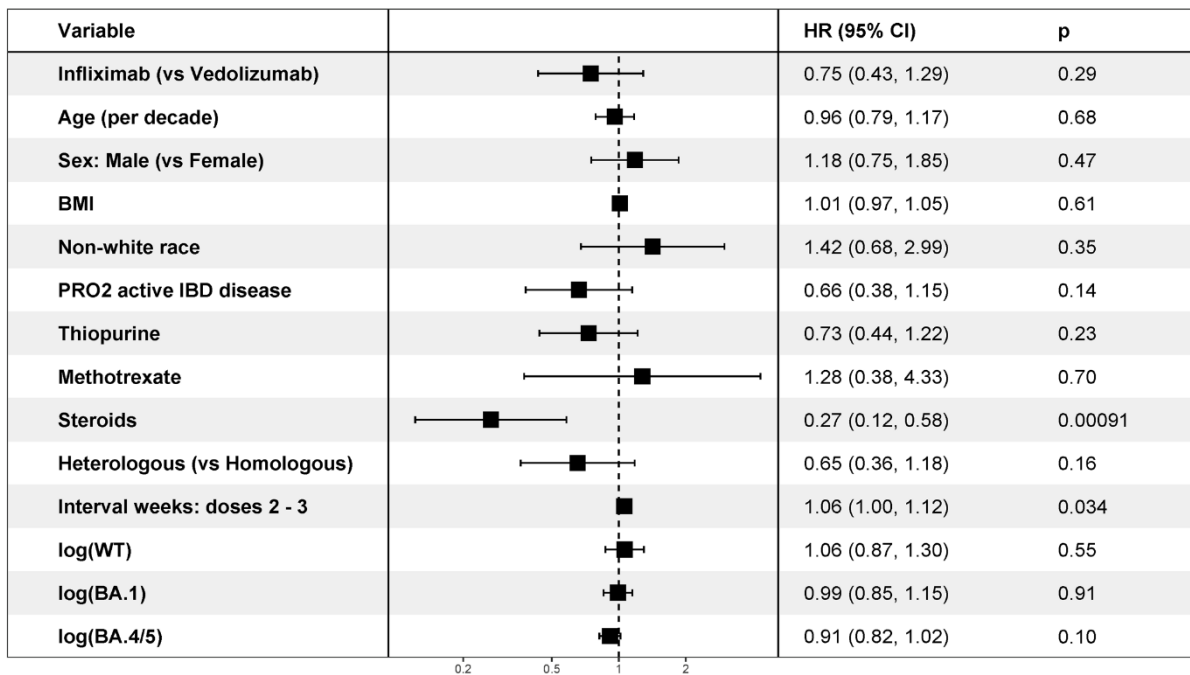

**Supplementary Figure 8.** Multivariable Cox proportional hazards regression model of factors associated with the risk of SARS-CoV-2 breakthrough infection in all patients with Crohn's disease (A) and patients with Crohn's disease who had a breakthrough infection (B). The dependent variable of the Cox proportional hazards model is the time from third vaccine dose to breakthrough infection and the coefficients represent the hazard ratio (HR) of developing SARS-CoV-2 breakthrough infection for each variable.

**A**

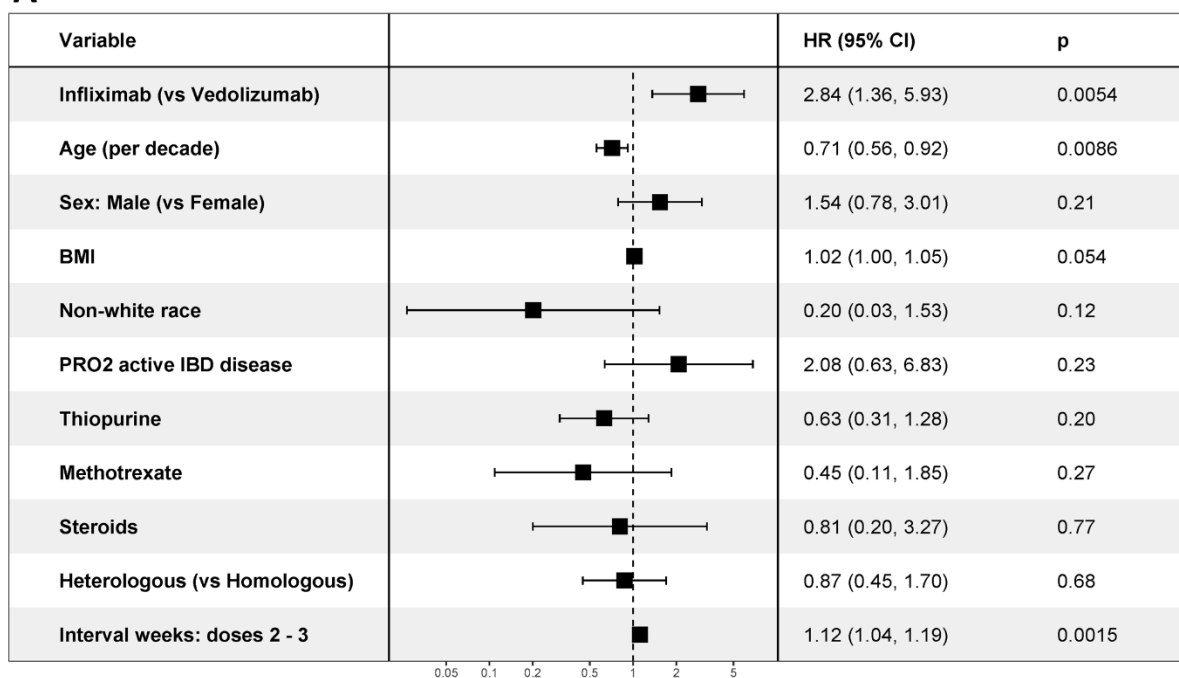

**B**

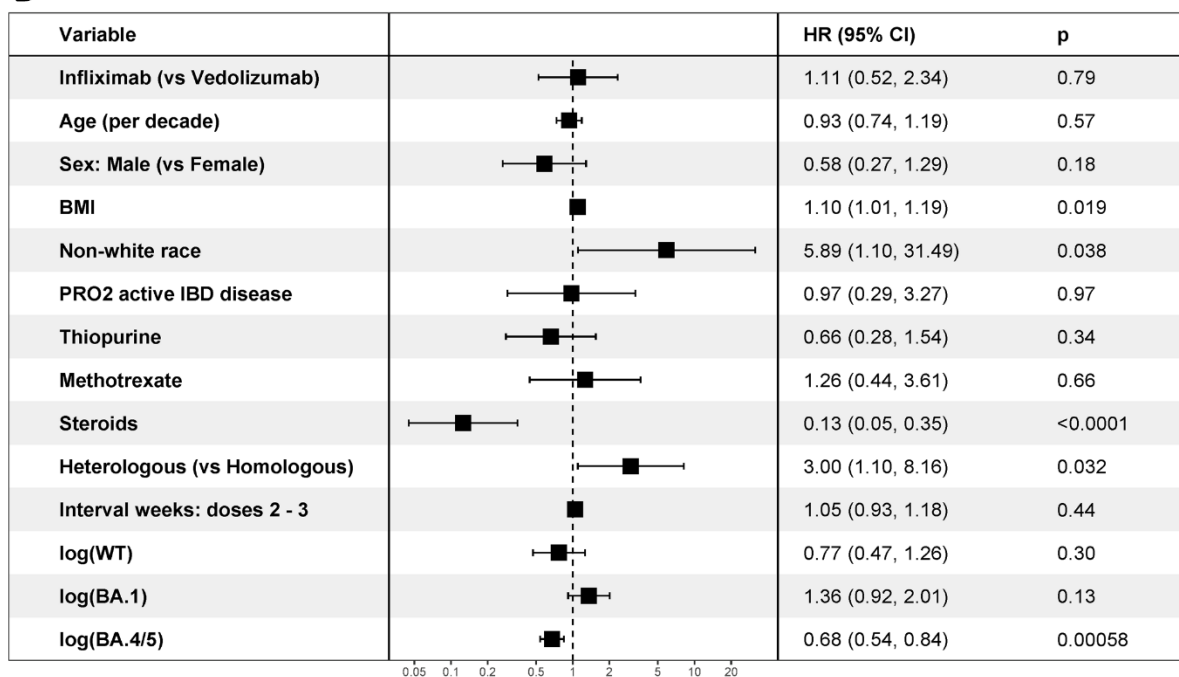

**Supplementary Figure 9.** Multivariable Cox proportional hazards regression model of factors associated with the risk of SARS-CoV-2 breakthrough infection in all patients with ulcerative colitis (A) and patients with ulcerative colitis who had a breakthrough infection (B). The dependent variable of the Cox proportional hazards model is the time from third vaccine dose to breakthrough infection and the coefficients represent



the hazard ratio (HR) of developing SARS-CoV-2 breakthrough infection for each variable.

**A**

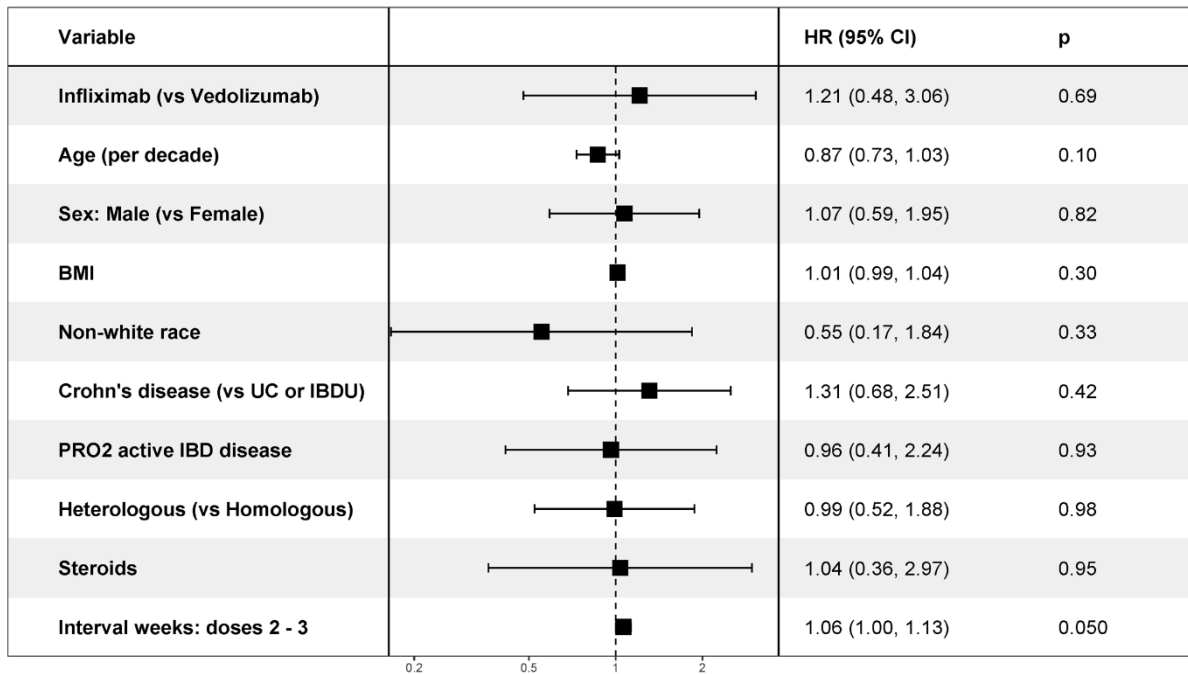

**B**

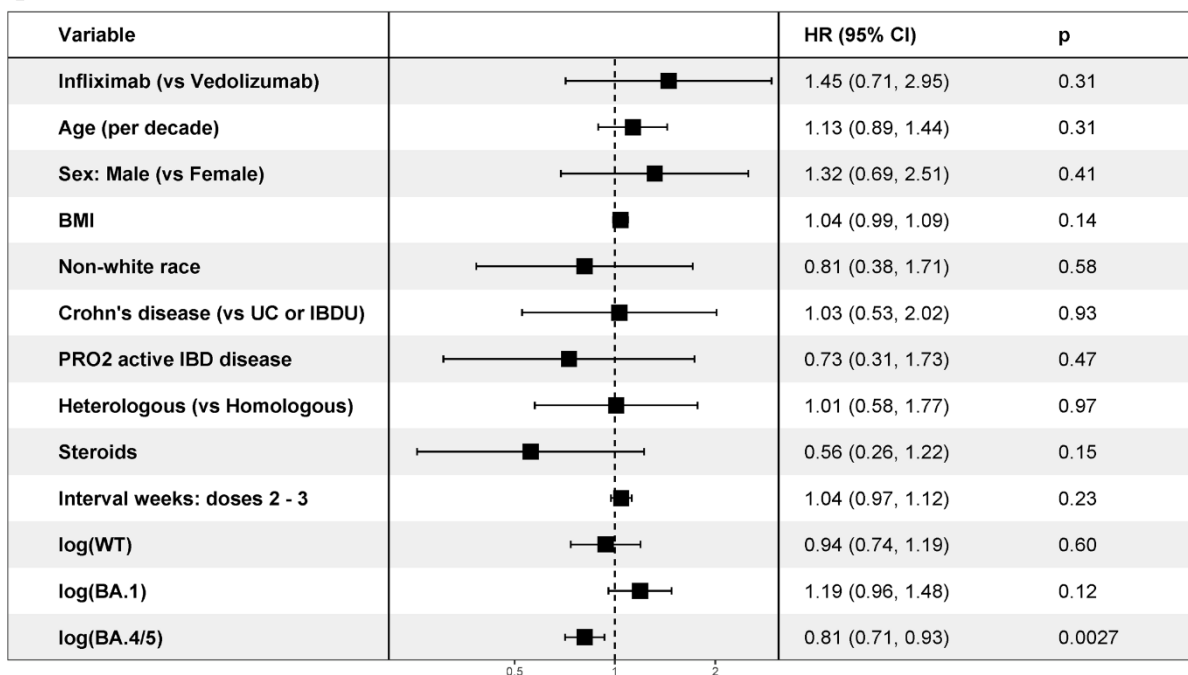

**Supplementary Figure 10.** Multivariable Cox proportional hazards regression model of factors associated with the risk of SARS-CoV-2 breakthrough infection in all patients treated with immunomodulators (A) and patients with immunomodulators who had a

breakthrough infection (B). The dependent variable of the Cox proportional hazards model is the time from third vaccine dose to breakthrough infection and the coefficients represent the hazard ratio (HR) of developing SARS-CoV-2 breakthrough infection for each variable.

**A**

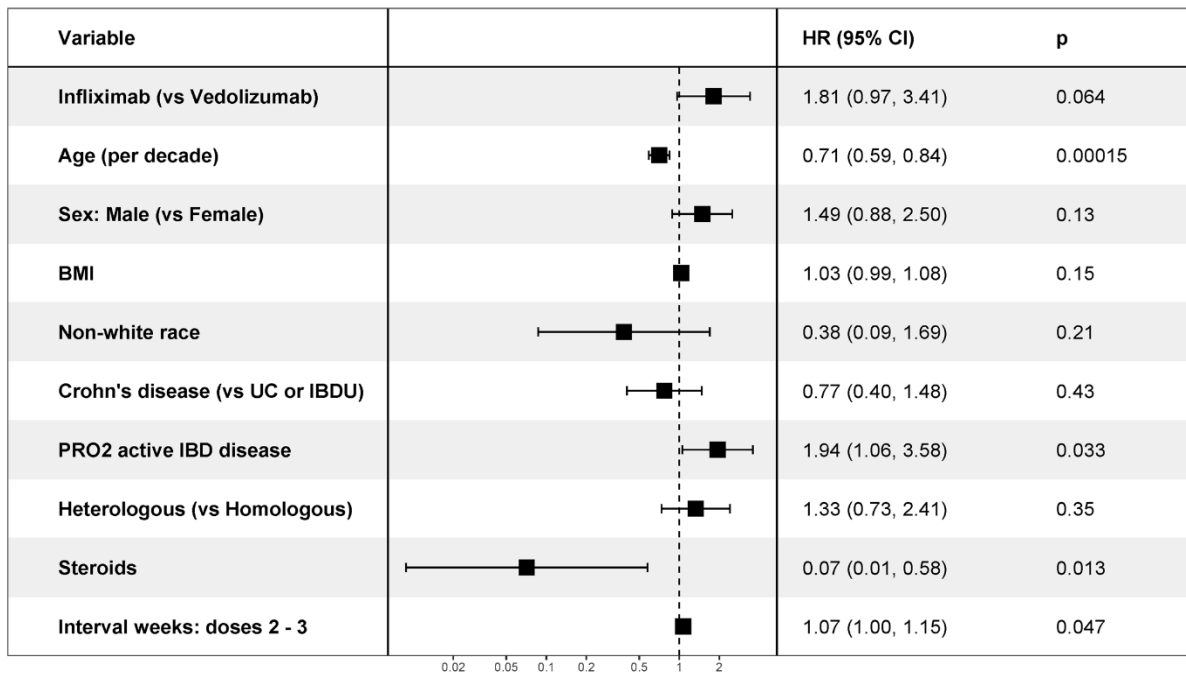

**B**

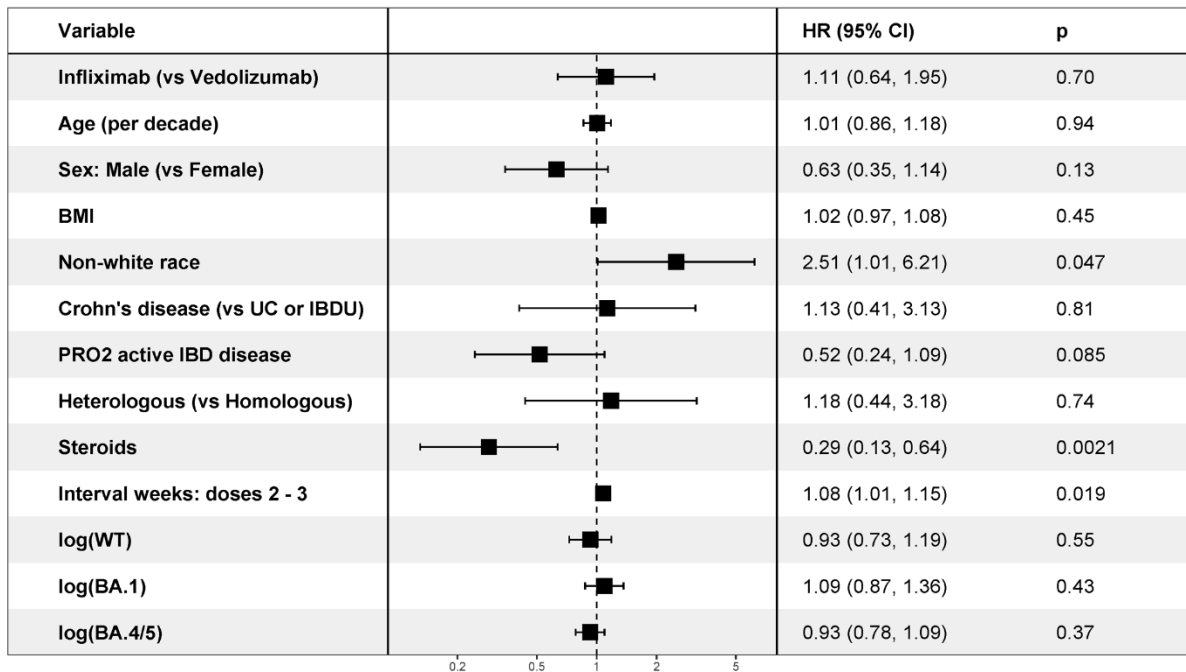

**Supplementary Figure 11.** Multivariable Cox proportional hazards regression model of factors associated with the risk of SARS-CoV-2 breakthrough infection in all patients without immunomodulator treatment (A) and patients without immunomodulator treatment who had a breakthrough infection (B). The dependent variable of the Cox proportional hazards model is the time from third vaccine dose to breakthrough infection and the coefficients represent the hazard ratio (HR) of developing SARS-CoV-2 breakthrough infection for each variable.

**A**

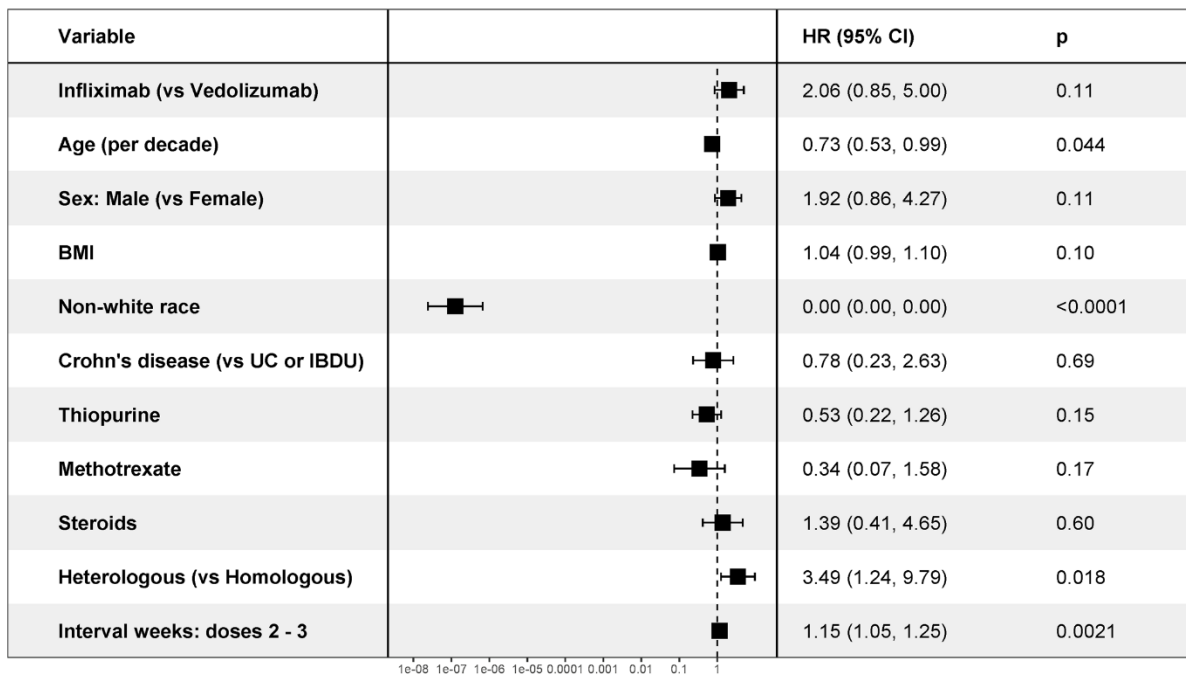

**B**

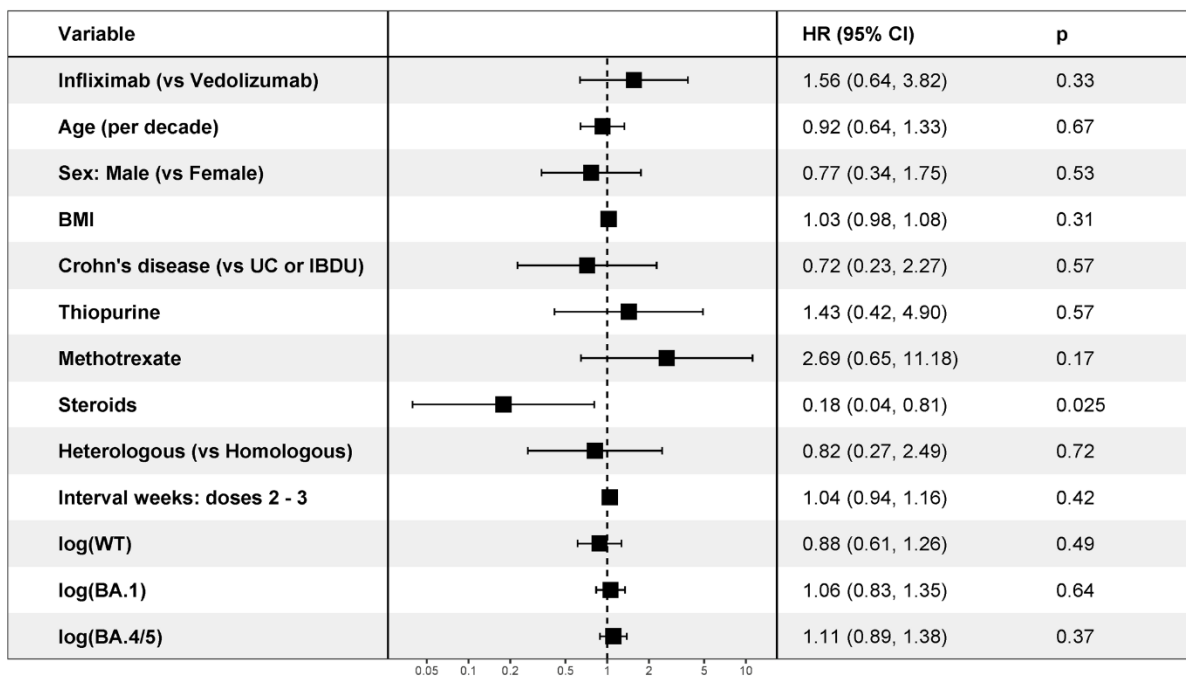

**Supplementary Figure 12.** Multivariable Cox proportional hazards regression model of factors associated with the risk of SARS-CoV-2 breakthrough infection in all patients with PRO2 active IBD disease (A) and patients with active IBD who had a breakthrough infection (B). The dependent variable of the Cox proportional hazards model is the time from third vaccine dose to breakthrough infection and the coefficients

represent the hazard ratio (HR) of developing SARS-CoV-2 breakthrough infection for each variable.

**A**

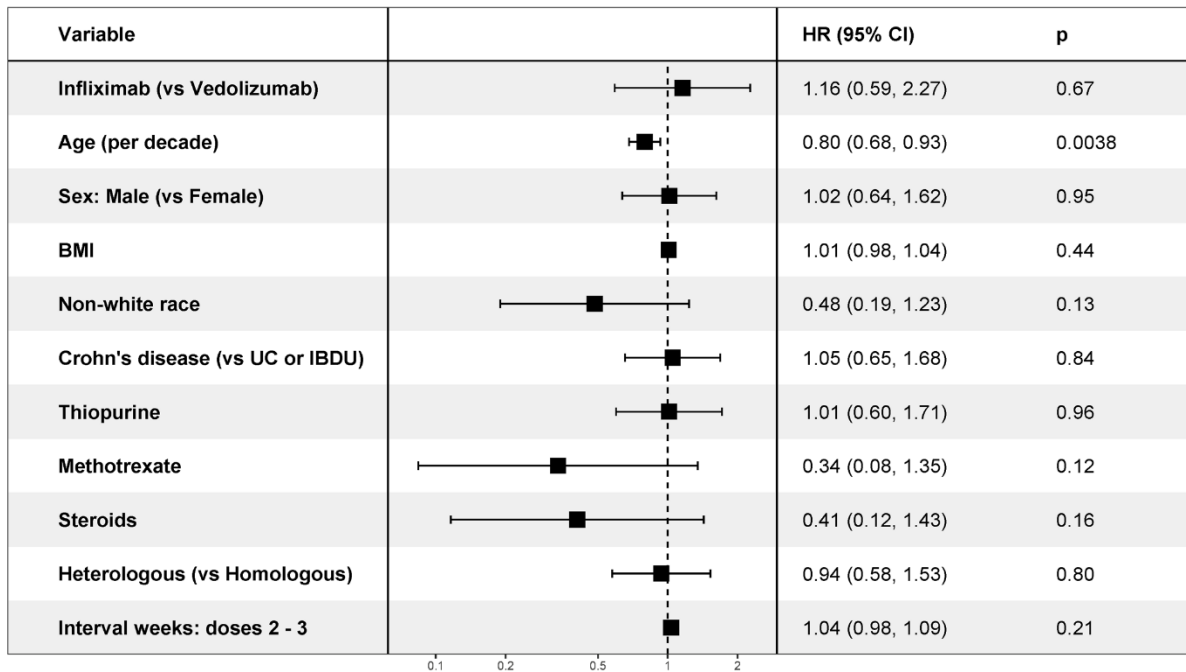

**B**

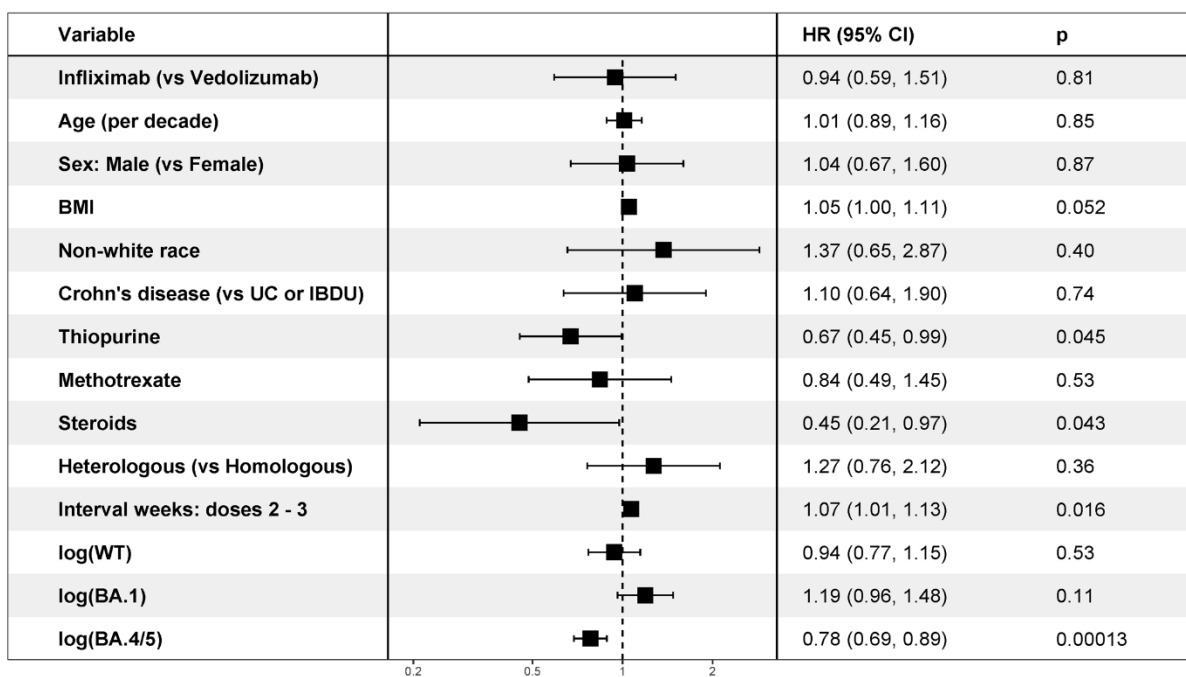

**Supplementary Figure 13.** Multivariable Cox proportional hazards regression model of factors associated with the risk of SARS-CoV-2 breakthrough infection in all patients with inactive IBD (defined by PRO2) (A) and patients with inactive IBD who had a

breakthrough infection (B). The dependent variable of the Cox proportional hazards model is the time from third vaccine dose to breakthrough infection and the coefficients represent the hazard ratio (HR) of developing SARS-CoV-2 breakthrough infection for each variable.

### A

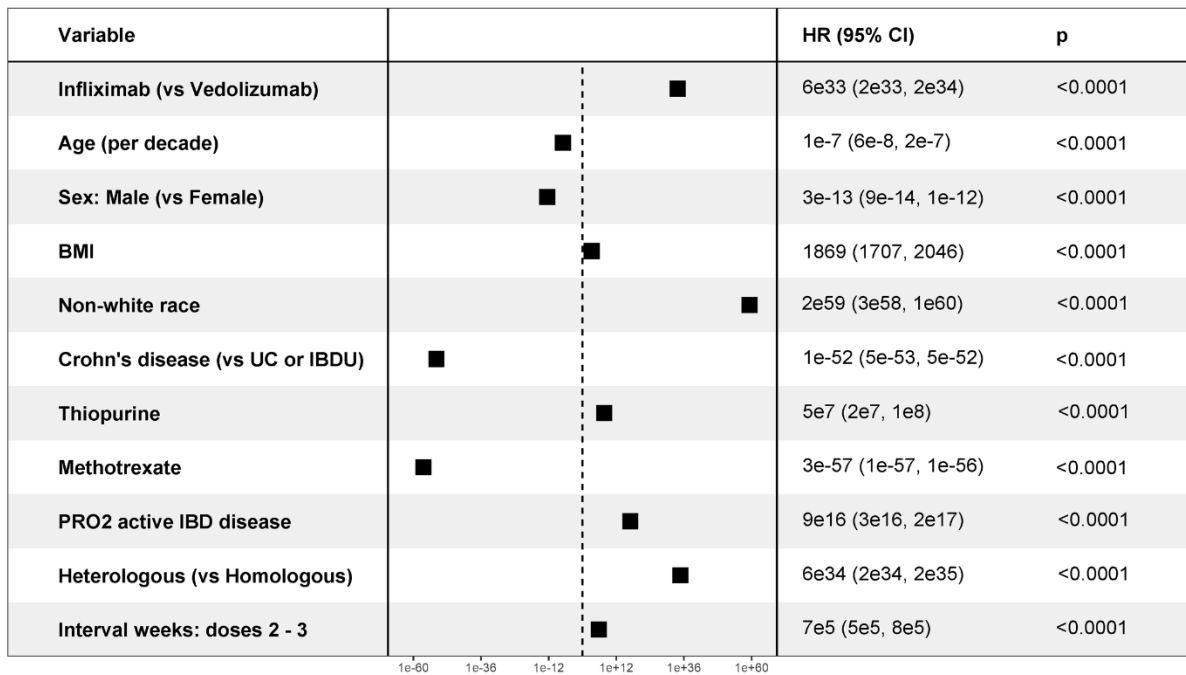

### B

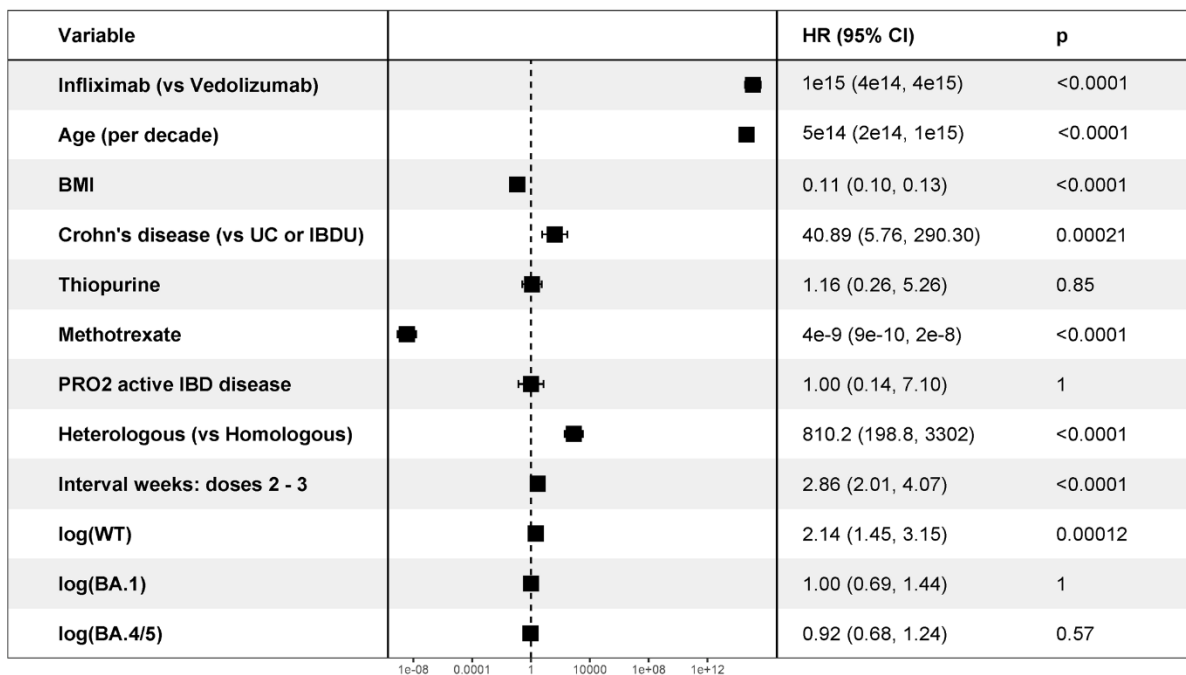

**Supplementary Figure 14.** Multivariable Cox proportional hazards regression model of factors associated with the risk of SARS-CoV-2 breakthrough infection in all patients with steroid treatment (A) and patients with steroid treatment who had a breakthrough infection (B). The dependent variable of the Cox proportional hazards model is the time from third vaccine dose to breakthrough infection and the coefficients represent the hazard ratio (HR) of developing SARS-CoV-2 breakthrough infection for each variable.

**A**

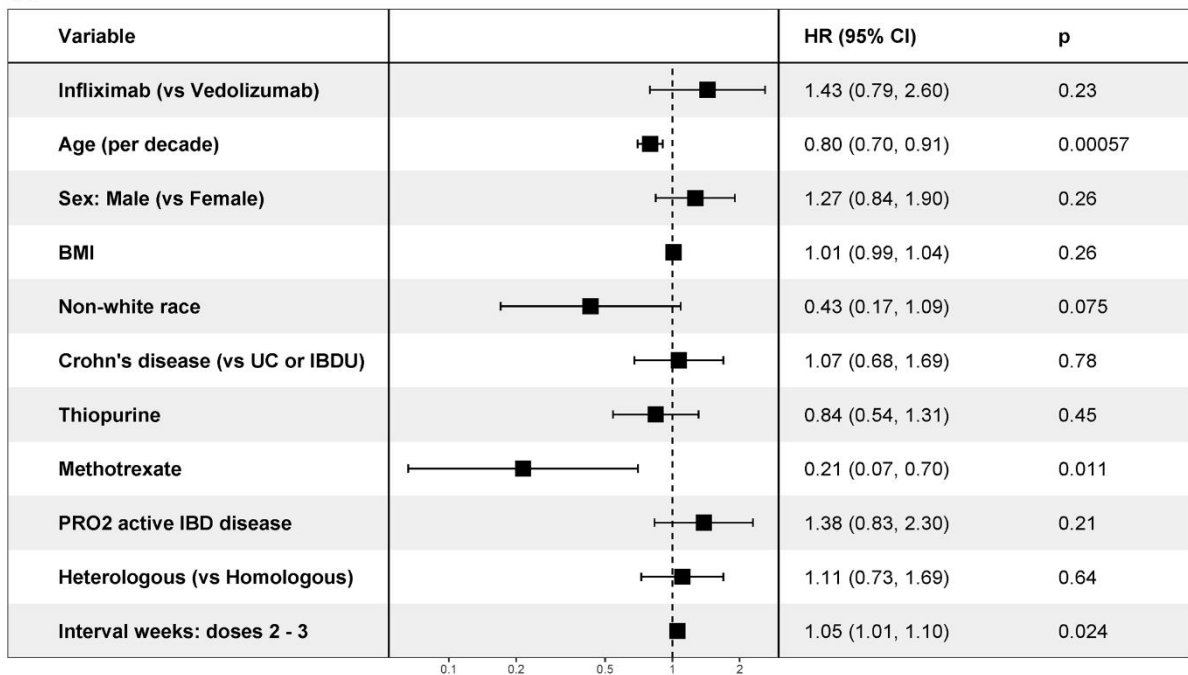

**B**

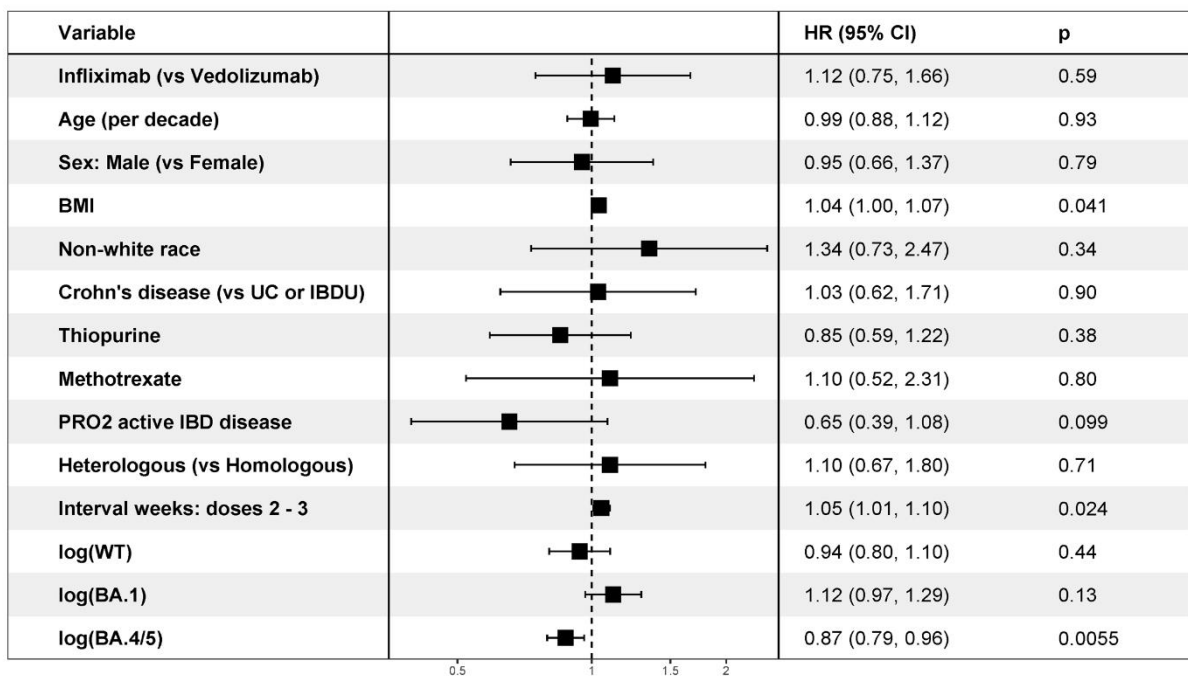

**Supplementary Figure 15.** Multivariable Cox proportional hazards regression model of factors associated with the risk of SARS-CoV-2 breakthrough infection in all patients without steroid treatment (A) and patients without steroid treatment who had a breakthrough infection (B). The dependent variable of the Cox proportional hazards model is the time from third vaccine dose to breakthrough infection and the coefficients



represent the hazard ratio (HR) of developing SARS-CoV-2 breakthrough infection for each variable.

**Supplementary Table 1.** Contributors to the CLARITY IBD study

| <b>Affiliation</b>                                                                  | <b>First name</b> | <b>Surname</b> |
|-------------------------------------------------------------------------------------|-------------------|----------------|
| Barts Health NHS Trust                                                              | Madiha            | Islam          |
|                                                                                     | Nick              | Croft          |
|                                                                                     | Bessie            | Cipriano       |
|                                                                                     | Caroline          | Francia        |
|                                                                                     | Nosheen           | Khalid         |
|                                                                                     | Ashley            | Kingston       |
|                                                                                     | Irish             | Lee            |
|                                                                                     | Anouk             | Lehmann        |
|                                                                                     | Kinnari           | Naik           |
|                                                                                     | Kevin             | Samuels        |
|                                                                                     | Nicolene          | Plaatjies      |
|                                                                                     | Hafiza            | Khatun         |
|                                                                                     | Farjana           | Bokth          |
| Elise                                                                               | Pabriaga          |                |
| Basingstoke and North Hampshire Hospital (Hampshire Hospitals NHS Foundation Trust) | Rebecca           | Saich          |
|                                                                                     | Hayley            | Cousins        |
|                                                                                     | Wendy             | Fraser         |
|                                                                                     | Rachel            | Thomas         |
|                                                                                     | Matthew           | Brown          |
|                                                                                     | Benjamin          | White          |
|                                                                                     | Nikolaos          | Kirkiniziadis  |
|                                                                                     | Bernadette        | Tilley         |
|                                                                                     | Pennie            | Porter         |
|                                                                                     | Rachel            | Bryant         |
| Natalia                                                                             | Robaczewska       |                |
| Birmingham Women's and Children's NHS Foundation Trust                              | Rafeeq            | Muhammed       |
|                                                                                     | Rehana            | Bi             |
|                                                                                     | Catherine         | Cotter         |
|                                                                                     | Jayne             | Grove          |
|                                                                                     | Kate              | Hong           |
|                                                                                     | Ruth              | Howman         |
|                                                                                     | Monica            | Mitchell       |
|                                                                                     | Sophie            | Clayton        |
|                                                                                     | Louise            | Rogers         |
|                                                                                     | Sugrah            | Sultan         |
|                                                                                     | Melanie           | Rooney         |
| Charlotte                                                                           | Cottrill          |                |
| Bolton NHS Foundation Trust                                                         | Salil             | Singh          |
|                                                                                     | Chris             | Dawe           |

|                                                                                                                                |             |            |
|--------------------------------------------------------------------------------------------------------------------------------|-------------|------------|
|                                                                                                                                | Robert      | Hull       |
|                                                                                                                                | Natalie     | Silva      |
|                                                                                                                                | Julie       | Chadwick   |
|                                                                                                                                | Laura       | Robertson  |
| Borders General Hospital                                                                                                       | Jonathan    | Manning    |
|                                                                                                                                | Lauren      | Finlayson  |
|                                                                                                                                | Allison     | Roebuck    |
|                                                                                                                                | Joy         | Dawson     |
| Calderdale and Huddersfield NHS Foundation Trust                                                                               | Sunil       | Sonwalkar  |
|                                                                                                                                | Naomi       | Chambers   |
|                                                                                                                                | Matthew     | Robinson   |
|                                                                                                                                | Andrew      | Haigh      |
|                                                                                                                                | Lear        | Matapure   |
| Cambridge University Hospitals NHS Foundation Trust                                                                            | Tim         | Raine      |
|                                                                                                                                | Varun       | George     |
|                                                                                                                                | Christina   | Kapizioni  |
|                                                                                                                                | Konstantina | Strongili  |
|                                                                                                                                | Tina        | Thompson   |
|                                                                                                                                | Mohamed     | Ahmed      |
|                                                                                                                                | Christos    | Kontos     |
|                                                                                                                                | Claire      | Dawson     |
| Cambridge Institute of Therapeutic Immunology and Infectious Disease, Jeffrey Cheah Biomedical Centre, University of Cambridge | Christophe  | Bourges    |
|                                                                                                                                | Isabella    | Barbutti   |
|                                                                                                                                | Megan E     | Gozzard    |
| Chelsea and Westminster Hospital NHS Foundation Trust                                                                          | Philip      | Hendy      |
|                                                                                                                                | Rhian       | Bull       |
|                                                                                                                                | Patricia    | Costa      |
|                                                                                                                                | Lisa        | Davey      |
|                                                                                                                                | Hayley      | Hannington |
|                                                                                                                                | Kribashnie  | Nundlall   |
|                                                                                                                                | Catarina    | Martins    |
|                                                                                                                                | Laura       | Avanzi     |
|                                                                                                                                | Jaime       | Carungcong |
|                                                                                                                                | Sabrina     | Barr       |
|                                                                                                                                | Richard     | Appleby    |
|                                                                                                                                | Emma        | Johnson    |
|                                                                                                                                | Eathar      | Shakweh    |
| Chesterfield Royal Hospital                                                                                                    | Kath        | Phillis    |
|                                                                                                                                | Rachel      | Gascoyne   |
|                                                                                                                                | Amanda      | Crowder    |
|                                                                                                                                | Amanda      | Whileman   |
| Countess Of Chester Hospital NHS Foundation Trust                                                                              | Ian         | London     |
|                                                                                                                                | Jenny       | Grounds    |

|                                                      |             |                |
|------------------------------------------------------|-------------|----------------|
|                                                      | Emmeline    | Martin         |
|                                                      | Susie       | Pajak          |
|                                                      | Jude        | Price          |
|                                                      | Kathryn     | Cawley         |
|                                                      | Sandra      | Powell         |
|                                                      | Nichola     | Kearsley       |
| Darlington Memorial Hospital                         | Anjan       | Dhar           |
|                                                      | Ellen       | Brown          |
|                                                      | Amanda      | Cowton         |
|                                                      | Kimberley   | Stamp          |
| Dartford and Gravesham NHS Trust                     | Ben         | Warner         |
|                                                      | Carmel      | Stuart         |
|                                                      | Louise      | Lacey          |
| The Dudley Group NHS Foundation Trust                | Shanika     | de Silva       |
|                                                      | Clare       | Allcock        |
|                                                      | Philip      | Harvey         |
|                                                      | Lesley      | Jones          |
|                                                      | Elise       | Cooke          |
|                                                      | Jayne       | Slater         |
|                                                      | Dominic     | King           |
| East and North Hertfordshire NHS Trust               | Johanne     | Brooks         |
|                                                      | Pearl       | Baker          |
|                                                      | Hannah      | Beadle         |
|                                                      | Carina      | Cruz           |
|                                                      | Debbie      | Potter         |
| East Lancashire Hospitals NHS Trust                  | Joe         | Collum         |
|                                                      | Farzana     | Masters        |
| Glangwili Hospital Hywel Dda University Health Board | Aashish     | Kumar          |
|                                                      | Samantha    | Coetzee        |
|                                                      | Mihaela     | Peiu           |
|                                                      | Becky       | Icke           |
|                                                      | Jill        | Williams       |
|                                                      | Meena       | Raj            |
| Great Ormond Street Hospital                         | Edward      | Gaynor         |
|                                                      | Sibongile   | Chadokufa      |
|                                                      | Bonita      | Huggett        |
|                                                      | Hamza       | Meghari        |
|                                                      | Sara        | El-Khouly      |
|                                                      | Fevronia    | Kiparissi      |
|                                                      | Waffa       | Girshab        |
|                                                      | Lynda       | Russell-Walker |
|                                                      | Christopher | Jackson        |
|                                                      | Sara        | Sidler         |

|                                               |              |                 |
|-----------------------------------------------|--------------|-----------------|
| Great Western Hospitals NHS Foundation Trust  | Andrew       | Claridge        |
|                                               | Emily        | Fowler          |
|                                               | Laura        | McCafferty      |
|                                               | Lesley       | Haxton          |
| Guy's and St Thomas' NHS Foundation Trust     | Peter        | Irving          |
|                                               | Karolina     | Christodoulides |
|                                               | Angela       | Clifford        |
|                                               | Patrick      | Dawson          |
|                                               | Sailish      | Honap           |
|                                               | Samuel       | Lim             |
|                                               | Raphael      | Luber           |
|                                               | Karina       | Mahiouz         |
|                                               | Susanna      | Meade           |
|                                               | Parizade     | Raymode         |
|                                               | Rebecca      | Reynolds        |
|                                               | Anna         | Stanton         |
|                                               | Sherill      | Tripoli         |
|                                               | Naomi        | Hare            |
|                                               | Sopuluchukwu | Odukwe          |
|                                               | Senthuran    | Balachandran    |
|                                               | Emma         | North           |
|                                               | Jessica      | North           |
| Bria                                          | Browne       |                 |
| Jessica                                       | Cordle       |                 |
| Ella                                          | Jameson      |                 |
| The Hillingdon Hospitals NHS Foundation Trust | Yih Harn     | Siaw            |
|                                               | Lane         | Manzano         |
|                                               | Jonathan     | Segal           |
|                                               | Ibrahim      | Al-Bakir        |
|                                               | Imran        | Khakoo          |
|                                               | Sofiya       | Portukhay       |
| Homerton University Hospital Foundation Trust | Nora         | Thoua           |
|                                               | Katherine    | Davidson        |
|                                               | Jagrul       | Miah            |
|                                               | Lisa         | Canclini        |
|                                               | Alex         | Hall            |
|                                               | Hassina      | Furreed         |
|                                               | Christine    | Mitchell-Inwang |
| Hull University Teaching Hospitals NHS Trust  | Melony       | Hayes           |
|                                               | Sally        | Myers           |
|                                               | Alison       | Talbot          |
|                                               | Jack         | Turnbull        |
|                                               | Emma         | Whitehead       |

|                                                       |                  |               |
|-------------------------------------------------------|------------------|---------------|
|                                                       | Katie            | Stamp         |
|                                                       | Alison           | Pattinson     |
|                                                       | Verghese         | Mathew        |
|                                                       | Leanne           | Sherris       |
|                                                       | Julie            | Wilcox        |
|                                                       | Sankaranarayanan | Ramachandran  |
|                                                       | Hayley           | Robertson     |
|                                                       | Angela           | Harvey        |
| Imperial College Healthcare NHS Trust                 | Lucy             | Hicks         |
|                                                       | Tara-Marie       | Byrne         |
|                                                       | Leilani          | Cabreros      |
|                                                       | Hannah           | Downing-Wood  |
|                                                       | Sophie           | Hunter        |
|                                                       | Mohammad Aamir   | Saifuddin     |
|                                                       | Hemanth          | Prabhudev     |
|                                                       | Sharmili         | Balarajah     |
|                                                       | Jan              | Krucznski     |
|                                                       | Kalliopi         | Driva         |
|                                                       | Andrea           | D'Mello       |
|                                                       | Parith           | Shah          |
| Faculty of Medicine, Imperial College London          | Rocio            | Castro-Seoane |
|                                                       | Hajir            | Ibraheim      |
|                                                       | Laura E          | Constable     |
|                                                       | Jonathan W       | Lo            |
|                                                       | Sherine K        | Hermangild    |
|                                                       | Melissa          | Torkizadeh    |
|                                                       | Leon R           | McFarlane     |
| James Paget University Hospitals NHS Foundation Trust | Helen            | Sutherland    |
|                                                       | Elva             | Wilhelmsen    |
|                                                       | Katherine        | Mackintosh    |
| Kettering General Hospital                            | Ajay M           | Verma         |
|                                                       | Juliemol         | Sebastian     |
|                                                       | Mohammad Farhad  | Peerally      |
|                                                       | Anne-marie       | Guerdette     |
|                                                       | Susan            | Coburn        |
|                                                       | Ching Yee        | Novem lam     |
|                                                       | Donna            | Durrant       |
|                                                       | Belinda          | Schaefer      |
|                                                       | Solange          | Serna         |
|                                                       | Muhammad         | Shahzad       |
| King's College Hospital NHS Foundation Trust          | Alexandra        | Kent          |
|                                                       | Lee Meng         | Choong        |
|                                                       | Benedetta        | Pantaloni     |

|                                                           |           |             |
|-----------------------------------------------------------|-----------|-------------|
|                                                           | Pantelis  | Ravdas      |
| King's College Hospital NHS Foundation Trust (paediatric) | Babu      | Vadamalayan |
| King's Mill Hospital                                      | Stephen   | Foley       |
|                                                           | Becky     | Arnold      |
|                                                           | Cheryl    | Heeley      |
|                                                           | Wayne     | Lovegrove   |
|                                                           | Donna     | Sowton      |
|                                                           | Lynne     | Allsop      |
|                                                           | Heidi     | Gregory     |
|                                                           | Mandy     | Gill        |
|                                                           | Megan     | Holmes      |
|                                                           | Valeria   | Balan       |
|                                                           | Susan     | Smith       |
| Sarah                                                     | Turner    |             |
| Liverpool University Hospitals NHS Foundation Trust       | Philip J  | Smith       |
|                                                           | Alan      | Steel       |
|                                                           | Giovanna  | Bretland    |
|                                                           | Sarah     | King        |
|                                                           | Martina   | Lofthouse   |
|                                                           | Lindsey   | Rigby       |
|                                                           | Sreedhar  | Subramanian |
|                                                           | David     | Tyrer       |
|                                                           | Kate      | Martin      |
| Christopher                                               | Probert   |             |
| London North West University                              | Nikolaos  | Kamperidis  |
| Healthcare NHS Trust                                      | Temi      | Adedoyin    |
|                                                           | Manisha   | Baden       |
|                                                           | Jeannette | Brown       |
|                                                           | Feba      | Chacko      |
|                                                           | Lisa      | Young       |
|                                                           | Michela   | Cicchetti   |
|                                                           | Mohammad  | Saifuddin   |
|                                                           | Priya     | Yesupatham  |
| Maidstone and Tunbridge Wells NHS Trust                   | Rohit     | Gowda       |
|                                                           | Maureen   | Williams    |
| Manchester University NHS Foundation Trust                | Karen     | Kemp        |
|                                                           | Rima      | Akhand      |
|                                                           | Glaxy     | Gray        |
|                                                           | Anu       | John        |
|                                                           | Maya      | John        |
|                                                           | Tasnim    | Mohammed    |
|                                                           | Diamond   | Sathe       |
|                                                           | Natasha   | Jones       |

|                                                               |             |                |
|---------------------------------------------------------------|-------------|----------------|
|                                                               | Jennifer    | Soren          |
| The Mid Yorkshire Hospitals NHS Trust                         | Michael     | Sprakes        |
|                                                               | Julie       | Burton         |
|                                                               | Patricia    | Kane           |
|                                                               | Stephanie   | Lupton         |
|                                                               | Jacqueline  | Bartholomew    |
|                                                               | Elizabeth   | Denis          |
|                                                               | Alison      | Daniels        |
| Milton Keynes University Hospital                             | George      | MacFaul        |
|                                                               | Diane       | Scaletta       |
|                                                               | Loria       | Siamia         |
|                                                               | Felicity    | Williams       |
|                                                               | Chloe       | Green          |
|                                                               | Zeljka      | Ver            |
| Newcastle Hospitals NHS Foundation Trust                      | Chris       | Lamb           |
|                                                               | Mary        | Doona          |
|                                                               | Ashleigh    | Hogg           |
|                                                               | Lesley      | Jeffrey        |
|                                                               | Andrew      | King           |
|                                                               | R Alexander | Speight        |
|                                                               | Jennifer    | Doyle          |
|                                                               | Ruth        | Owen           |
|                                                               | Jenny       | Haworth        |
|                                                               | Linda       | Patterson      |
|                                                               | Vithusa     | Varnaulasingam |
| Ninewells Hospital & Medical School                           | Craig       | Mowat          |
|                                                               | Debbie      | Rice           |
|                                                               | Susan       | MacFarlane     |
|                                                               | Anne        | MacLeod        |
|                                                               | Samera      | Mohammed       |
|                                                               | Shona       | Murray         |
|                                                               | Anne        | Elliott        |
| Norfolk and Norwich University Hospitals NHS Foundation Trust | Mary        | Anne Morris    |
|                                                               | Louise      | Coke           |
|                                                               | Grace       | Hindle         |
|                                                               | Eirini      | Kolokouri      |
|                                                               | Catherine   | Wright         |
|                                                               | Claire      | Lee            |
|                                                               | Nicola      | Ward           |
|                                                               | Adele       | Dann           |
| North Bristol NHS Trust                                       | Melanie     | Lockett        |
|                                                               | Charlotte   | Cranfield      |
|                                                               | Louise      | Jennings       |



|                                                   |           |               |
|---------------------------------------------------|-----------|---------------|
|                                                   | Ankur     | Srivastava    |
|                                                   | Lana      | Ward          |
|                                                   | Nouf      | Jeynes        |
|                                                   | Poonam    | Ranga         |
| North Tyneside General Hospital                   | Praveen   | Rajasekhar    |
|                                                   | Lisa      | Gallagher     |
|                                                   | Jill      | Ward          |
|                                                   | Rae       | Basnett       |
|                                                   | Judy      | Murphy        |
|                                                   | Lauren    | Parking       |
|                                                   | Emma      | Lawson        |
|                                                   | Stacey    | Short         |
| Nottingham University Hospitals NHS Trust         | David     | Devadason     |
|                                                   | Gordon    | Moran         |
|                                                   | Neelam    | Khan          |
|                                                   | Lauren    | Tarr          |
|                                                   | Charmaine | Olivia        |
|                                                   | Samantha  | Warbarton     |
|                                                   | Sian      | Kelly         |
| The Pennine Acute Hospitals NHS Trust             | Jimmy     | Limdi         |
|                                                   | Kay       | Goulden       |
|                                                   | Asad      | Javed         |
|                                                   | Lauren    | McKenzie      |
|                                                   | Julie     | Melville      |
|                                                   | Eleanor   | Liu           |
|                                                   | Joseph    | Sabine        |
|                                                   | Patricia  | Jacob         |
|                                                   | Denise    | McSorland     |
|                                                   | Nick      | Schofield     |
|                                                   | Lisa      | Cornwall      |
|                                                   | James     | Quirke        |
|                                                   | Emma      | Crook         |
|                                                   | Anne      | Turner        |
| Portsmouth Hospitals NHS Trust                    | Pradeep   | Bhandari      |
|                                                   | Michelle  | Baker-Moffatt |
|                                                   | Joanne    | Dash          |
|                                                   | Alison    | Le Poidevin   |
|                                                   | Hayley    | Downe         |
|                                                   | Lucille   | Bombero       |
|                                                   | Helen     | Blackman      |
|                                                   | Rebecca   | Smith         |
| The Queen Elizabeth Hospital Kings Lynn NHS Trust | Alan      | Wiles         |
|                                                   | Hannah    | Bloxham       |

|                                                        |           |                |
|--------------------------------------------------------|-----------|----------------|
|                                                        | Jose      | Dias           |
|                                                        | Evelyn    | Nadar          |
|                                                        | Hollie    | Curgenven      |
|                                                        | Ellie     | Gilham         |
| Queen Elizabeth University Hospital, Glasgow           | Jonathan  | Macdonald      |
|                                                        | Shona     | Finan          |
|                                                        | Faye      | McMeeken       |
|                                                        | Misbah    | Mahmood        |
|                                                        | Stephanie | Shields        |
|                                                        | John Paul | Seenan         |
| Royal Berkshire NHS Foundation Trust                   | Des       | DeSilva        |
|                                                        | Susanna   | Malkakorpi     |
|                                                        | Rachel    | Carson         |
|                                                        | Holly     | Lawrence       |
|                                                        | Ofori     | Boateng        |
|                                                        | Felix     | Kpodo          |
| University Hospitals Dorset NHS Foundation Trust       | Simon     | Whiteoak       |
|                                                        | Kelli     | Edger-Earley   |
|                                                        | Luke      | Vamplew        |
|                                                        | Joanna    | Samways        |
|                                                        | Sue       | Roffe          |
| Royal Cornwall Hospitals NHS Trust                     | Sarah     | Ingram         |
|                                                        | Joel      | James          |
|                                                        | Sharon    | Botfield       |
|                                                        | Fiona     | Hammonds       |
|                                                        | Clare     | James          |
|                                                        | Zoe       | Berry          |
| Royal Devon University Healthcare NHS Foundation Trust | Gemma     | Aspinall       |
|                                                        | Sarah     | Hawkins        |
|                                                        | Marian    | Parkinson      |
|                                                        | Helen     | Gardner-Thorpe |
|                                                        | Suzie     | Marriott       |
|                                                        | Clare     | Redstone       |
|                                                        | Halina    | Windak         |
|                                                        | Ana-Marie | Adam           |
|                                                        | Hannah    | Mabb           |
|                                                        | Emma      | Stevenson      |
|                                                        | Jessica   | Record         |
| Royal Free London NHS Foundation Trust                 | Charles   | Murray         |
|                                                        | Cynthia   | Diaba          |
|                                                        | Fexy      | Joseph         |
|                                                        | Glykeria  | Pakou          |
|                                                        | Yvonne    | Gleeson        |

|                                                                            |             |           |
|----------------------------------------------------------------------------|-------------|-----------|
|                                                                            | Annalyn     | Nunag     |
| Royal Glamorgan Hospital                                                   | James       | Berrill   |
|                                                                            | Natalie     | Stroud    |
|                                                                            | Carla       | Pothecary |
|                                                                            | Lisa        | Roche     |
|                                                                            | Keri        | Turner    |
|                                                                            | Lisa        | Deering   |
|                                                                            | Lynda       | Israel    |
| Royal Gwent Hospital                                                       | Evelyn      | Baker     |
|                                                                            | Maxine      | Nash      |
| Royal Manchester Children's Hospital                                       | Andrew      | Fagbemi   |
|                                                                            | Felicia     | Jennings  |
|                                                                            | Imelda      | Mayor     |
|                                                                            | Jill        | Wilson    |
|                                                                            | Alice       | Wheeler   |
|                                                                            | Nicola      | Phillips  |
| Royal Hampshire County Hospital (Hampshire Hospitals NHS Foundation Trust) | John        | Gordon    |
|                                                                            | Emma        | Levell    |
|                                                                            | Silvia      | Zagalo    |
|                                                                            | Ina         | Hoad      |
|                                                                            | Bindu       | Anil      |
| Royal Hospital for Sick Children, Edinburgh                                | Richard     | Russell   |
|                                                                            | Paul        | Henderson |
|                                                                            | Margaret    | Millar    |
| Royal Surrey County Hospital                                               | Christopher | Alexakis  |
|                                                                            | Natalia     | Michalak  |
|                                                                            | Cheryl      | Marriott  |
|                                                                            | Sarah       | Stone     |
|                                                                            | Veronika    | Pristopan |
| Royal United Hospitals Bath                                                | John        | Saunders  |
|                                                                            | Helen       | Burton    |
|                                                                            | Vanessa     | Cambridge |
|                                                                            | Tonia       | Clark     |
|                                                                            | Charlotte   | Ekblad    |
|                                                                            | Sarah       | Hierons   |
|                                                                            | Joyce       | Katebe    |
|                                                                            | Emma        | Saunbury  |
|                                                                            | Rachel      | Perry     |
| The Royal Wolverhampton NHS Trust                                          | Matthew     | Brookes   |
|                                                                            | Kathryn     | Davies    |
|                                                                            | Marie       | Green     |
|                                                                            | Ann         | Plumbe    |
| Salford Royal NHS Foundation Trust                                         | Clare       | Ormerod   |

|                                                        |           |             |
|--------------------------------------------------------|-----------|-------------|
|                                                        | Helen     | Christensen |
|                                                        | Hannah    | Howlett     |
|                                                        | Anne      | Keen        |
|                                                        | Jonathan  | Ogor        |
|                                                        | Marie     | Greenhaigh  |
|                                                        | Karen     | Knowles     |
|                                                        | Shanzi    | Yin         |
|                                                        | Maria     | Poulaka     |
| Salisbury District Hospital                            | Alpha     | Anthony     |
|                                                        | Emily     | Newitt      |
|                                                        | Fiona     | Trim        |
|                                                        | Ruth      | Casey       |
|                                                        | Katherine | Seymour     |
|                                                        | Catherine | Reed        |
|                                                        | Lijo      | Joy         |
| Sandwell and West Birmingham NHS Trust                 | Edward    | Fogden      |
|                                                        | Kalisha   | Russell     |
|                                                        | Samia     | Hussain     |
| Sheffield Teaching Hospitals NHS Foundation Trust      | Anne      | Phillips    |
|                                                        | Muaad     | Abdulla     |
| Shrewsbury and Telford Hospital NHS Trust              | Jeff      | Butterworth |
|                                                        | Colene    | Adams       |
|                                                        | Mandy     | Carnahan    |
|                                                        | Elizabeth | Buckingham  |
|                                                        | Danielle  | Childs      |
|                                                        | Alison    | Magness     |
|                                                        | Jo        | Stickley    |
|                                                        | Nichola   | Motherwell  |
|                                                        | Louise    | Tonks       |
|                                                        | Hannah    | Gibson      |
| Kate                                                   | Wistance  |             |
| Singleton Hospital Swansea Bay University Health Board | Caradog   | Thomas      |
|                                                        | Elaine    | Brinkworth  |
|                                                        | Lynda     | Connor      |
|                                                        | Amanda    | Cook        |
|                                                        | Tabitha   | Rees        |
|                                                        | Rachel    | Harford     |
|                                                        | Sean      | Farley      |
|                                                        | Marie     | Jones       |
| Somerset NHS Foundation Trust                          | Emma      | Wesley      |
|                                                        | Alison    | Moss        |
|                                                        | Jacob     | Lucas       |
|                                                        | Claire    | Lorimer     |

|                                                                        |           |            |
|------------------------------------------------------------------------|-----------|------------|
|                                                                        | Maria     | Oleary     |
|                                                                        | Maxine    | Dixon      |
|                                                                        | Fiona     | Goodchild  |
|                                                                        | Rebecca   | Twenlow    |
|                                                                        | Corinne   | Pawley     |
| South Tees Hospitals NHS Foundation Trust                              | Arvind    | Ramadas    |
|                                                                        | Julie     | Tregonning |
|                                                                        | Olaku     | Okeke      |
|                                                                        | Wendy     | Jackson    |
| Southend University Hospital NHS Foundation Trust                      | Ioannis   | Koumoutsos |
|                                                                        | Viji      | George     |
|                                                                        | Swapna    | Kunhunni   |
|                                                                        | Sophie    | Laverick   |
|                                                                        | Isla      | Anderson   |
|                                                                        | Sophie    | Smith      |
|                                                                        | Joan      | Joyce      |
|                                                                        | Sarala    | Janarthan  |
| St George's University Hospitals NHS Foundation Trust                  | Kamal     | Patel      |
|                                                                        | Mariam    | Ali        |
|                                                                        | Hilda     | Mhandu     |
|                                                                        | Aleem     | Rana       |
|                                                                        | Katherine | Spears     |
|                                                                        | Joana     | Teixeira   |
|                                                                        | Mark      | Mencias    |
|                                                                        | Abigail   | Seaward    |
|                                                                        | Jessica   | Sousa      |
|                                                                        | Nooria    | Said       |
|                                                                        | Mark      | Soomaroo   |
|                                                                        | Valentina | Raspa      |
|                                                                        | Asha      | Tacouri    |
| St George's University Hospitals NHS Foundation Trust (paediatric)     | Nicholas  | Reps       |
|                                                                        | Rebecca   | Martin     |
|                                                                        | Tinashe   | Samakomva  |
| St James's University Hospital (The Leeds Teaching Hospital NHS Trust) | Christian | Selinger   |
|                                                                        | Jenelyn   | Carbonell  |
|                                                                        | Felicia   | Onovira    |
|                                                                        | Doris     | Quartey    |
|                                                                        | Alice     | L'Anson    |
|                                                                        | Andrew    | Ashworth   |
|                                                                        | Jessica   | Bailey     |
|                                                                        | Angie     | Dunn       |
|                                                                        | Gjuzel    | Bespaloi   |
|                                                                        | Harold    | Rasalan    |

|                                                               |             |               |
|---------------------------------------------------------------|-------------|---------------|
| Stockport NHS Foundation Trust                                | Zahid       | Mahmood       |
|                                                               | Racheal     | Campbell      |
|                                                               | Liane       | Marsh         |
|                                                               | Tricia      | Coughlan      |
|                                                               | Wisam       | Jafar         |
|                                                               | Janet       | Marrs         |
|                                                               | Christopher | McPheat       |
| Surrey and Sussex Healthcare NHS Trust                        | Monira      | Rahman        |
|                                                               | Sarah       | Davies        |
|                                                               | Ruth        | Habibi        |
|                                                               | Ellen       | Jessup-Dunton |
|                                                               | Teishel     | Joefield      |
|                                                               | Reina       | Layug         |
| Tameside and Glossop Integrated Care NHS Foundation Trust     | Vinod       | Patel         |
|                                                               | Joanne      | Vere          |
|                                                               | Victoria    | Turner        |
|                                                               | Susan       | Kilroy        |
|                                                               | Martina     | Coulding      |
|                                                               | Martyn      | Clark         |
|                                                               | Jacqueline  | McCormick     |
|                                                               | Attiya      | Nisar         |
| Torbay and South Devon NHS Foundation Trust                   | Gareth      | Walker        |
|                                                               | Stacey      | Atkins        |
|                                                               | Jasmine     | Growdon       |
|                                                               | Becky       | George        |
|                                                               | Charlotte   | McNeill       |
|                                                               | Bryony      | Reed          |
|                                                               | Angela      | Foulds        |
|                                                               | Catherine   | Marshall      |
|                                                               | Michele     | Allison       |
|                                                               | Briony      | Dillon        |
| University Hospitals Birmingham NHS Foundation Trust          | Rachel      | Cooney        |
|                                                               | Lillie      | Bennett       |
|                                                               | Louise      | Bowlas        |
|                                                               | Sharafaath  | Shariff       |
| University Hospitals Bristol NHS Foundation Trust             | Aileen      | Fraser        |
|                                                               | Dwayne      | Punnette      |
|                                                               | Rebecca     | Lambert       |
|                                                               | Charlotte   | Bishop-Hurman |
|                                                               | Elizabeth   | Undrell       |
|                                                               | Katherine   | Belfield      |
| University Hospitals of Derby and Burton NHS Foundation Trust | Said        | Din           |
|                                                               | Catherine   | Addleton      |

|                                                          |           |                  |
|----------------------------------------------------------|-----------|------------------|
|                                                          | Marie     | Appleby          |
|                                                          | Johanna   | Brown            |
|                                                          | Kathleen  | Holding          |
|                                                          | Catherine | Fraser           |
|                                                          | Janice    | Birkenshaw       |
|                                                          | Jodie     | Williams         |
|                                                          | Kamille   | Maulion          |
|                                                          | Meg       | Lane             |
|                                                          | Arita     | Kravale          |
|                                                          | Claud     | Smith            |
| University Hospitals of Leicester NHS Trust              | Patricia  | Hooper           |
|                                                          | John      | deCaestecker     |
|                                                          | Olivia    | Watchorn         |
|                                                          | Ellie     | Clarke           |
| University Hospitals Plymouth NHS Trust                  | Chris     | Hayward          |
|                                                          | Susan     | Inniss           |
|                                                          | Lucy      | Pritchard        |
|                                                          | Karen     | Rudge            |
|                                                          | Amanda    | Carney           |
|                                                          | Sarah     | Griffee          |
| United Lincolnshire Hospitals NHS Trust                  | Jervoise  | Andreyev         |
|                                                          | Sathish   | Babu             |
|                                                          | Caroline  | Hayhurst         |
|                                                          | Carol     | Lockwood         |
|                                                          | Lynn      | Osborne          |
|                                                          | Amanda    | Roper            |
|                                                          | Karen     | Warner           |
|                                                          | Julia     | Hindle           |
|                                                          | Tara      | Lawrence         |
|                                                          | Kimberley | Netherton        |
|                                                          | Caroline  | Watt             |
|                                                          | Kinga     | Szymiczek        |
| University College London Hospitals NHS Foundation Trust | Shameer   | Mehta            |
|                                                          | James     | Bell             |
|                                                          | William   | Blad             |
|                                                          | Lisa      | Whitley          |
|                                                          | Roman     | Jastrub          |
| University Hospital Llandough                            | Dhamaraj  | Durai            |
|                                                          | Mark      | Baker            |
|                                                          | Elizabeth | John Sivamurugan |
|                                                          | Mim       | Evans            |
| University Hospital Southampton NHS Foundation Trust     | Fraser    | Cummings         |
|                                                          | Clare     | Harris           |

|                                                                                            |              |               |
|--------------------------------------------------------------------------------------------|--------------|---------------|
|                                                                                            | Amy          | Jones         |
|                                                                                            | Liga         | Krauze        |
|                                                                                            | Sohail       | Rahmany       |
|                                                                                            | Michelle     | Earl          |
|                                                                                            | Jenny        | Vowles        |
|                                                                                            | Audrey       | Torokwa       |
|                                                                                            | Mirela       | Petrova       |
|                                                                                            | Andrew       | Procter       |
|                                                                                            | Jo           | Stanley       |
|                                                                                            | Claudia      | Silvamoniz    |
|                                                                                            | Marion       | Betty         |
| University Hospital of Wales (paediatric)                                                  | Amar         | Wahid         |
|                                                                                            | Zoe          | Morrison      |
|                                                                                            | Rhian        | Thomas-Turner |
|                                                                                            | Louise       | Yendle        |
|                                                                                            | Jennifer     | Muller        |
| Exeter NIHR Clinical Research Facility, University of Exeter                               | Marcus       | Mitchell      |
|                                                                                            | John         | Kirkwood      |
|                                                                                            | Anna         | Barnes        |
| West Hertfordshire Hospitals NHS Trust                                                     | Rakesh       | Chaudhary     |
|                                                                                            | Melanie      | Claridge      |
|                                                                                            | Chiara       | Ellis         |
|                                                                                            | Cheryl       | Kemp          |
|                                                                                            | Ogwa         | Tobi          |
|                                                                                            | Jentus       | Milton        |
| West Middlesex University Hospital (Chelsea and Westminster NHS Hospital Foundation Trust) | Emma         | Johnston      |
|                                                                                            | Metod        | Oblak         |
|                                                                                            | Carmen       | Winpenny      |
|                                                                                            | Marie-Louise | Svensson      |
| West Suffolk NHS Foundation Trust                                                          | Jo           | Godden        |
|                                                                                            | Marium       | Ashhar        |
| Western General Hospital                                                                   | Debbie       | Alexander     |
|                                                                                            | Kate         | Covil         |
|                                                                                            | Lauranne     | Derikx        |
|                                                                                            | Syros        | Siakavellas   |
|                                                                                            | Helen        | Baxter        |
|                                                                                            | Scott        | Robertson     |
|                                                                                            | Linda        | Smith         |
|                                                                                            | Beena        | Poulose       |
|                                                                                            | Anne         | Colemam       |
|                                                                                            | Margareta    | Balint        |
|                                                                                            | Gareth       | Rhys-Jones    |
| Helen                                                                                      | Watters      |               |



|                                               |           |                |
|-----------------------------------------------|-----------|----------------|
|                                               | Susan     | Begg           |
|                                               | Beatriz   | Grosalcalde    |
|                                               | Judy      | Coyle          |
| Withybush General Hospital                    | Kerrie    | Johns          |
|                                               | Rachel    | Hughes         |
|                                               | Janet     | Phipps         |
|                                               | Abigail   | Taylor         |
|                                               | Catherine | MacPhee        |
|                                               | Suzanne   | Brooks         |
|                                               | Jolene    | John           |
|                                               | Michelle  | Edwards        |
| Yeovil District Hospital NHS Foundation Trust | Katie     | Smith          |
|                                               | Linda     | Howard         |
|                                               | Dianne    | Wood           |
| York Teaching Hospital NHS Foundation Trust   | Ajay      | Muddu          |
|                                               | Laura     | Barman         |
|                                               | Janine    | Mallinson      |
|                                               | Tania     | Neale          |
|                                               | Diana     | Ionita         |
|                                               | Kerry     | Elliot         |
|                                               | Alison    | Turnball       |
| Ysbyty Gwynedd                                | Iola      | Thomas         |
|                                               | Alice     | Thomas         |
|                                               | Kelly     | Andrews        |
|                                               | Jonathon  | Sutton         |
|                                               | Caroline  | Mulvaney Jones |
|                                               | Julia     | Roberts        |
|                                               | Jeannie   | Bishop         |
